# Supplementary material for: High-performance flexible p-type Ce-filled Fe3CoSb12 skutterudite thin film for medium-to-high-temperature applications
Source: PubMed Central journal article supplement (PMC11102547; doi:10.1038/s41467-024-48677-4), 2024-05-18
Supplement: 41467_2024_48677_MOESM1_ESM.pdf [file 41467_2024_48677_MOESM1_ESM.pdf]

## Supporting Information

# High-performance flexible p-type Ce-filled Fe<sub>3</sub>CoSb<sub>12</sub> skutterudite thin film for medium-to-high-temperature applications

*Dou Li,<sup>1,a</sup> Xiao-Lei Shi,<sup>2,a</sup> Jiayi Zhu,<sup>1</sup> Tianyi Cao,<sup>2</sup> Xiao Ma,<sup>1</sup> Meng Li,<sup>2</sup> Zhuokun Han,<sup>3</sup> Zhenyu Feng,<sup>1</sup> Yixing Chen,<sup>1</sup> Jianyuan Wang,<sup>3</sup> Wei-Di Liu,<sup>2</sup> Hong Zhong,<sup>1,\*</sup> Shuangming Li,<sup>1,\*</sup> Zhi-Gang Chen<sup>2,\*</sup>*

<sup>1</sup> State Key Laboratory of Solidification Processing, Northwestern Polytechnical University, Xi'an 710072, P. R. China.

<sup>2</sup> School of Chemistry and Physics, ARC Research Hub in Zero-emission Power Generation for Carbon Neutrality, and Centre for Materials Science, Queensland University of Technology, Brisbane, Queensland 4000, Australia;

<sup>3</sup> MOE Key Laboratory of Material Physics and Chemistry Under Extraordinary Conditions, School of Physical Science and Technology, Northwestern Polytechnical University, Xi'an, 710072, P. R. China.

<sup>a</sup> These authors contributed equally: Dou Li, Xiao-Lei Shi.

Corresponding Author:

\* Hong Zhong: zhonghong123@nwpu.edu.cn;

\* Shuangming Li: lsm@nwpu.edu.cn;

\* Zhi-Gang Chen: zhigang.chen@qut.edu.au.

## Calculation Details

**First-principles calculations:** First-principles calculations were performed based on density-functional theory (DFT) with the all-electron projected augmented wave (PAW) method, as implemented in the Vienna Ab initio Simulation Package (VASP) <sup>1-6</sup>. Semi-local generalized gradient approximation (GGA) with the fully relativistic Perdew-Burke-Ernzerhof (PBE) exchange-correlation functional was employed <sup>7</sup>. The valence wave functions were expanded on a plan-wave basis with a cut-off energy of 450 eV. All atoms were allowed to relax in their geometric optimizations, with a convergence criterion of  $1 \times 10^{-7}$  eV per electron and  $1 \times 10^{-3}$  eV·Å<sup>-1</sup> per unit cell. The Brillouin zone was sampled by a Monkhorst-Pack **k**-mesh spanning less than  $0.06/\text{Å}^3$  for structural relaxation, and a denser **k**-mesh spanning less than  $0.03/\text{Å}^3$  for calculating static self-consistency and density-of-state (DOS). The electron band structures were calculated along the line-mode **k**-path based on Brillouin path features indicated by the AFLOW framework <sup>8</sup>. To precisely predict bandgap, the Hubbard U model was considered; The on-site coulombic (U) and the exchange (J) terms were determined using a linear corresponding method.

**SPB modeling:** There are <sup>9-12</sup>:

$$S(\eta) = \frac{k_B}{e} \cdot \left[ \frac{\left(r+\frac{5}{2}\right) \cdot F_{r+\frac{3}{2}}(\eta)}{\left(r+\frac{3}{2}\right) \cdot F_{r+\frac{1}{2}}(\eta)} - \eta \right] \quad (\text{S1-1})$$

$$p = \frac{1}{e \cdot R_H} = \frac{(2m^* \cdot k_B T)^{\frac{3}{2}}}{3\pi^2 \hbar^3} \cdot \frac{\left(r+\frac{3}{2}\right)^2 \cdot F_{r+\frac{1}{2}}^2(\eta)}{\left(2r+\frac{3}{2}\right) \cdot F_{2r+\frac{1}{2}}(\eta)} \quad (\text{S1-2})$$

$$\mu = \left[ \frac{e\pi\hbar^4}{\sqrt{2}(k_B T)^{\frac{3}{2}} E_{def}^2 (m^*)^{\frac{5}{2}}} C_l \right] \frac{\left(2r+\frac{3}{2}\right) \cdot F_{2r+\frac{1}{2}}(\eta)}{\left(r+\frac{3}{2}\right)^2 \cdot F_{r+\frac{1}{2}}(\eta)} \quad (\text{S1-3})$$

$$L = \left(\frac{k_B}{e}\right)^2 \cdot \left\{ \frac{\left(r+\frac{7}{2}\right) \cdot F_{r+\frac{5}{2}}(\eta)}{\left(r+\frac{3}{2}\right) \cdot F_{r+\frac{1}{2}}(\eta)} - \left[ \frac{\left(r+\frac{5}{2}\right) \cdot F_{r+\frac{3}{2}}(\eta)}{\left(r+\frac{3}{2}\right) \cdot F_{r+\frac{1}{2}}(\eta)} \right]^2 \right\} \quad (\text{S1-4})$$

where  $\eta$  is the reduced Fermi level,  $k_B$  is the Boltzmann constant,  $r$  is the carrier scattering factor ( $r = -1/2$  for acoustic phonon scattering),  $R_H$  is the Hall coefficient,  $C_l$  is the elastic constant for longitudinal vibrations, and  $E_{def}$  is the deformation potential coefficient, respectively. There is <sup>9-12</sup>:

$$C_l = v_L^2 \cdot d \tag{S1-5}$$

The longitudinal velocity  $v_L$  is derived from the reference <sup>13-15</sup>.  $F_i(\eta)$  is the Fermi integral, expressed as <sup>9-12</sup>:

$$F_i(\eta) = \int_0^\infty \frac{x^i}{1+e^{(x-\eta)}} dx \tag{S1-6}$$

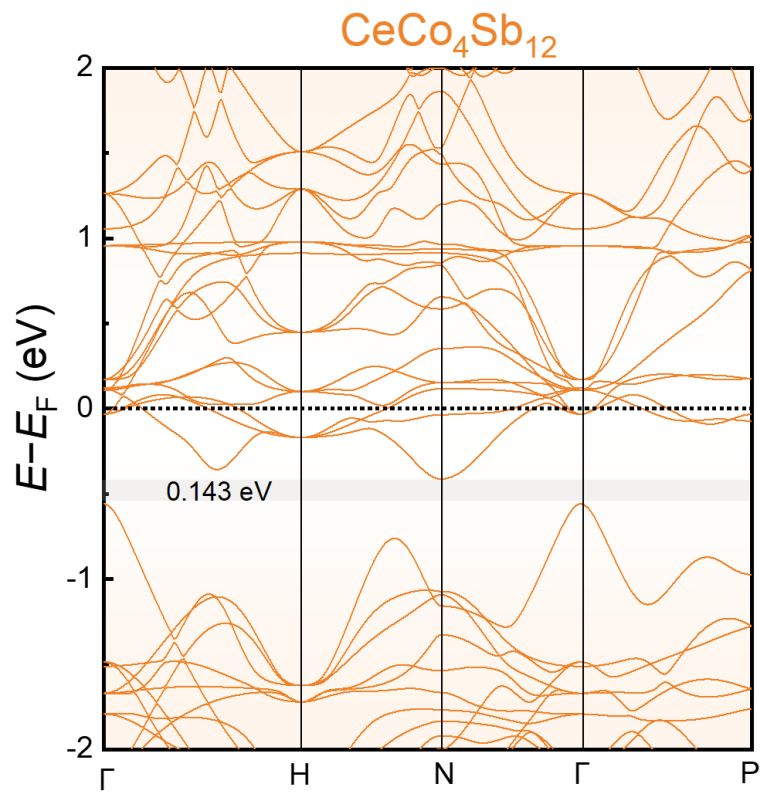

**Supplementary Fig. 1** Calculated band structure of  $\text{CeCo}_4\text{Sb}_{12}$ .

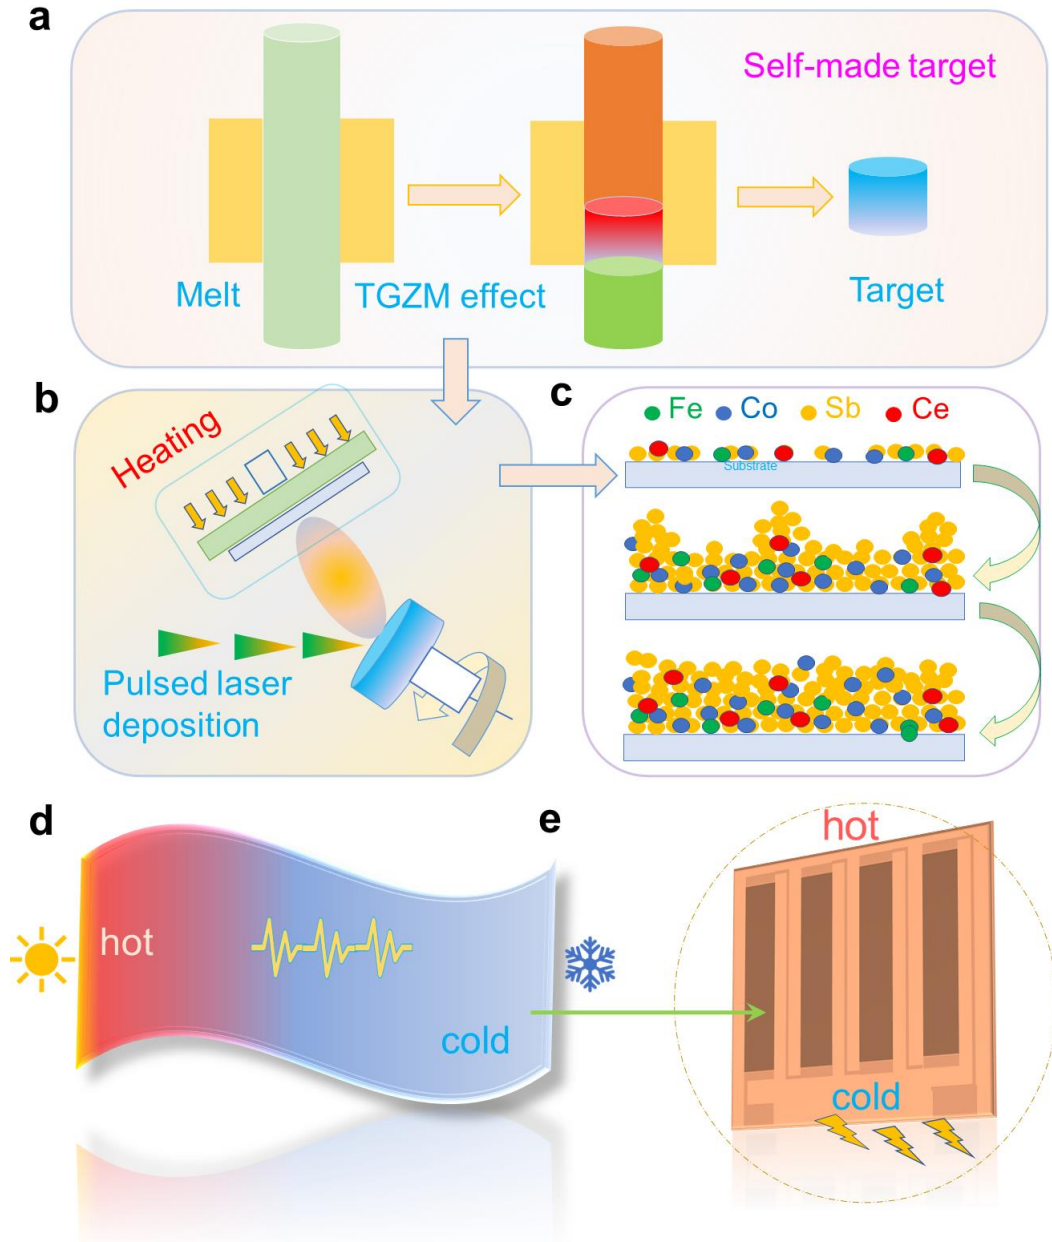

**Supplementary Fig. 2** Schematic diagram of fabrication process of thin-film thermoelectric materials and devices. **(a)** Self-made  $\text{Ce}_x\text{Fe}_3\text{CoSb}_{12}$ -based pulse laser deposition (PLD) target ( $x = 0.25, 0.50, 0.75, 1.25,$  and  $1.50$ ) prepared based on the temperature gradient zone melting (TGZM) effect <sup>16</sup>. **(b)** Illustration of the PLD process. **(c)** Illustration of the growth process of  $\text{Ce}_x\text{Fe}_3\text{CoSb}_{12}$ -based thin films. **(d)** Schematic diagram of the prepared flexible  $\text{Ce}_x\text{Fe}_3\text{CoSb}_{12}$ -based thermoelectric thin films. **(e)** Schematic diagram of the thermoelectric device made from the flexible  $\text{Ce}_x\text{Fe}_3\text{CoSb}_{12}$ -based thermoelectric thin films.

**Shenzhen Runsea Electronic Co., Ltd**  
**深圳市润海电子有限公司**

**PI Film Test Report**  
**产品物性报告单(PI薄膜)**

| 序号<br>No. | 指标名称<br>Test content name      |                                      | 单位<br>Unit    | 指标值<br>Tolerance Range                                                                    | 检测结果<br>Test result                  |
|-----------|--------------------------------|--------------------------------------|---------------|-------------------------------------------------------------------------------------------|--------------------------------------|
| 1         | Surface 外观                     |                                      | -             | Amber polyimide Film, surface smooth, no wrinkles and bubbles, neat edges without damage. | Pass                                 |
| 2         | Film roll and core膜卷与管芯        |                                      | mm            | As customed 客户要求                                                                          | —<br>—                               |
| 3         | Thickness 厚度                   |                                      | um            | 25/50/75/100/125/150/175/200/225/250                                                      | 25/50/75/100/125/150/175/200/225/250 |
|           | Thickness Tolerance 厚度允许偏差     |                                      |               | ±5                                                                                        | —                                    |
| 4         | Joint接头数                       |                                      | each100<br>0m | ≤2                                                                                        | 0                                    |
|           | length                         |                                      | m             | 400                                                                                       | —                                    |
| 5         | Width 薄膜宽度                     |                                      | MM            | 520                                                                                       | 520                                  |
|           | Width Tolerance 宽度允许偏差         |                                      |               | ±5                                                                                        | -                                    |
| 6         | Tensile Strength<br>拉伸强度       | MD纵向                                 | Mpa           | ≥135                                                                                      | 139                                  |
|           |                                | TD横向                                 |               | ≥115                                                                                      | 118                                  |
| 7         | Elongation 延伸率                 | MD纵向                                 | %             | ≥35                                                                                       | 55                                   |
|           |                                | TD横向                                 |               |                                                                                           | 70                                   |
| 8         | Insulation Strength<br>绝缘强度    | 平均值<br>Average                       | MV/m          | ≥135                                                                                      | 135                                  |
|           |                                | 个别值<br>Individual                    |               | ≥100                                                                                      | 110                                  |
| 9         | Surface Resistivity表面电阻率, 200℃ |                                      | Ω             | ≥1.0*10 <sup>13</sup>                                                                     | 1.1*10 <sup>13</sup>                 |
| 10        | Shrinkage收缩率, 250℃±5           | MD纵向                                 | %             | ≤1.0                                                                                      | 0.3                                  |
|           |                                | TD横向                                 |               | ≤0.9                                                                                      | 0.12                                 |
| 11        | Breakdown voltage击穿电压          | 25um厚                                | KV            | ≥3KV                                                                                      | 3KV                                  |
|           |                                | 50/75/100/125/150/175/200/225/250um厚 |               | ≥5KV                                                                                      | 5KV                                  |
| 12        | Temperature resistance耐温       | 25/50um厚                             | ℃             | 250                                                                                       | 250                                  |
|           |                                | 75/100/125/150/175/200/225/250um厚    |               | ℃                                                                                         | 350                                  |
| 13        | Volume Resistivity体积电阻, 200℃   |                                      | Ω m           | ≥1.0*10 <sup>13</sup>                                                                     | 1.0*10 <sup>13</sup>                 |

**Supplementary Fig. 3** Detailed information on the polyimide (PI) films used as the flexible supporting substrates for all Ce<sub>x</sub>Fe<sub>3</sub>CoSb<sub>12</sub>-based thin films ( $x = 0.25, 0.50, 0.75, 1.25, \text{ and } 1.50$ ) in this work.

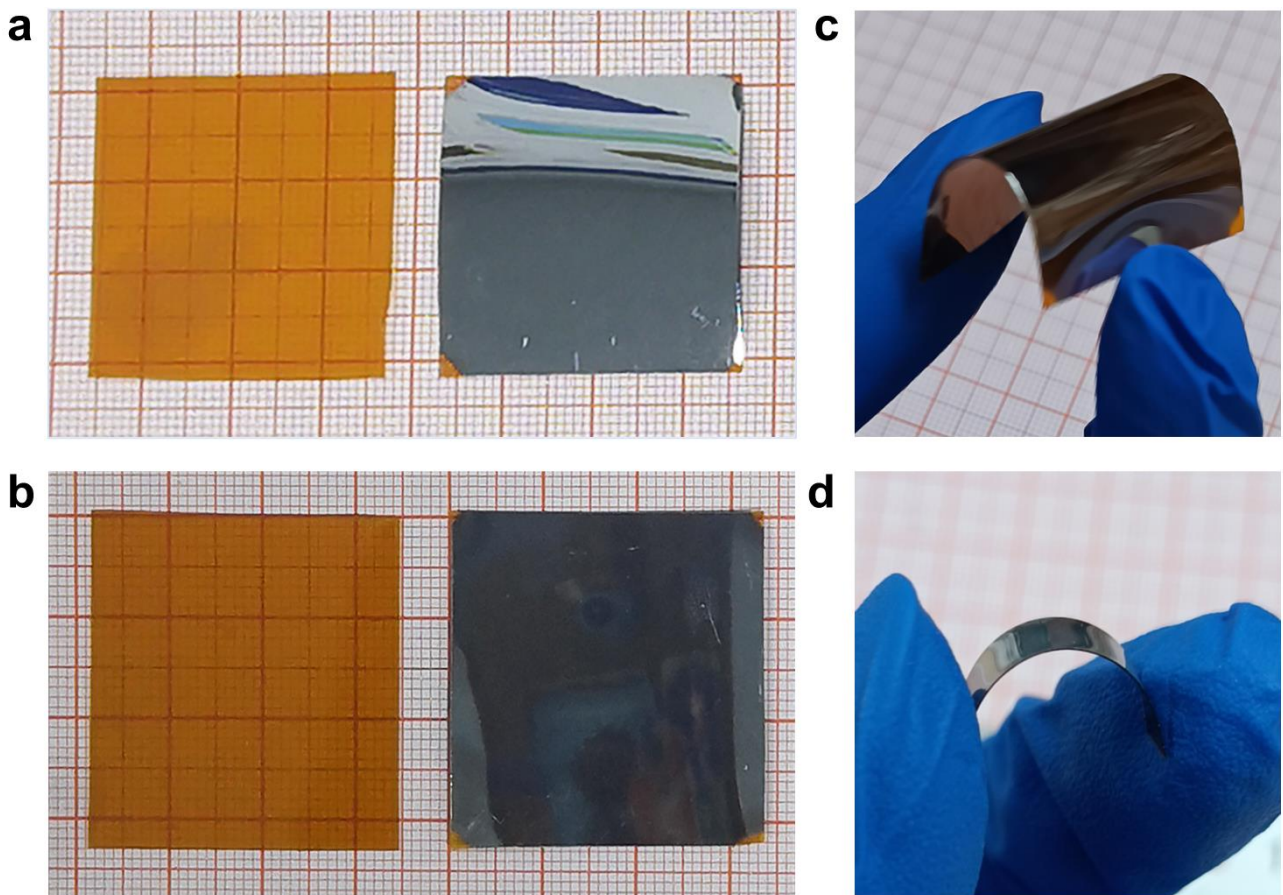

**Supplementary Fig. 4** Photos of skutterudite thin films before and after deposition and the bending state of the films. **(a-b)** Photographs of PI substrates and p-type  $\text{Ce}_{1.25}\text{Fe}_3\text{CoSb}_{12}$  skutterudite thin films on the substrates from top views. **(c-d)** Schematic diagrams depicting films of various sizes that can be bent.

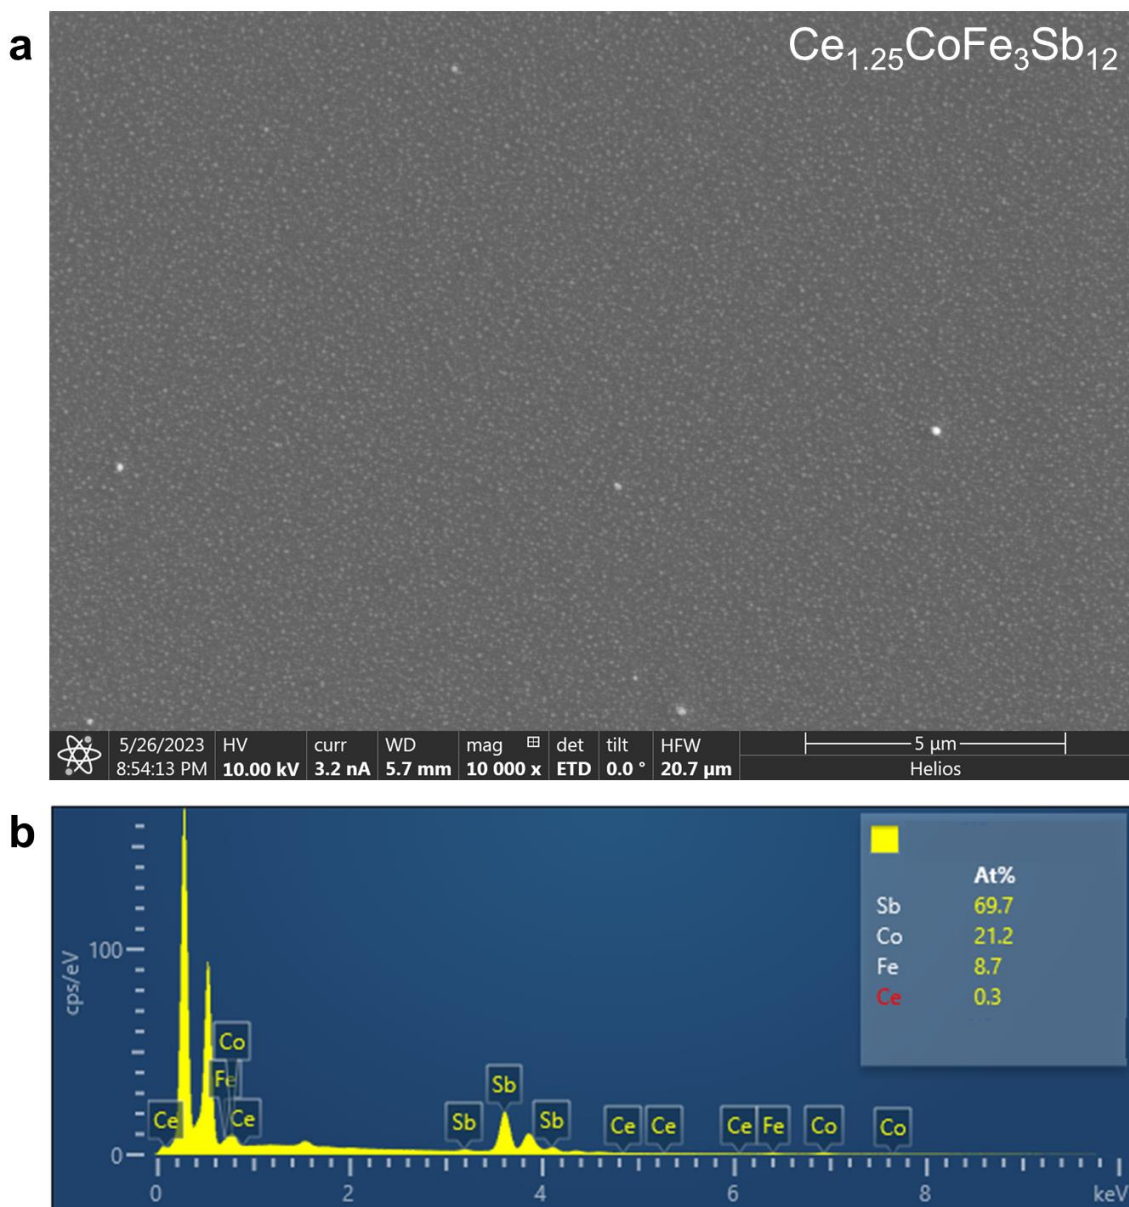

**Supplementary Fig. 5** The surface morphology and composition of  $\text{Ce}_{1.25}\text{Fe}_3\text{CoSb}_{12}$  skutterudite thin film. **(a)** Enlarged version of the original scanning electron microscopy (SEM) image of  $\text{Ce}_{1.25}\text{Fe}_3\text{CoSb}_{12}$  skutterudite thin film from a top view. **(b)** Corresponding energy dispersive X-ray spectrometry (EDS) result.



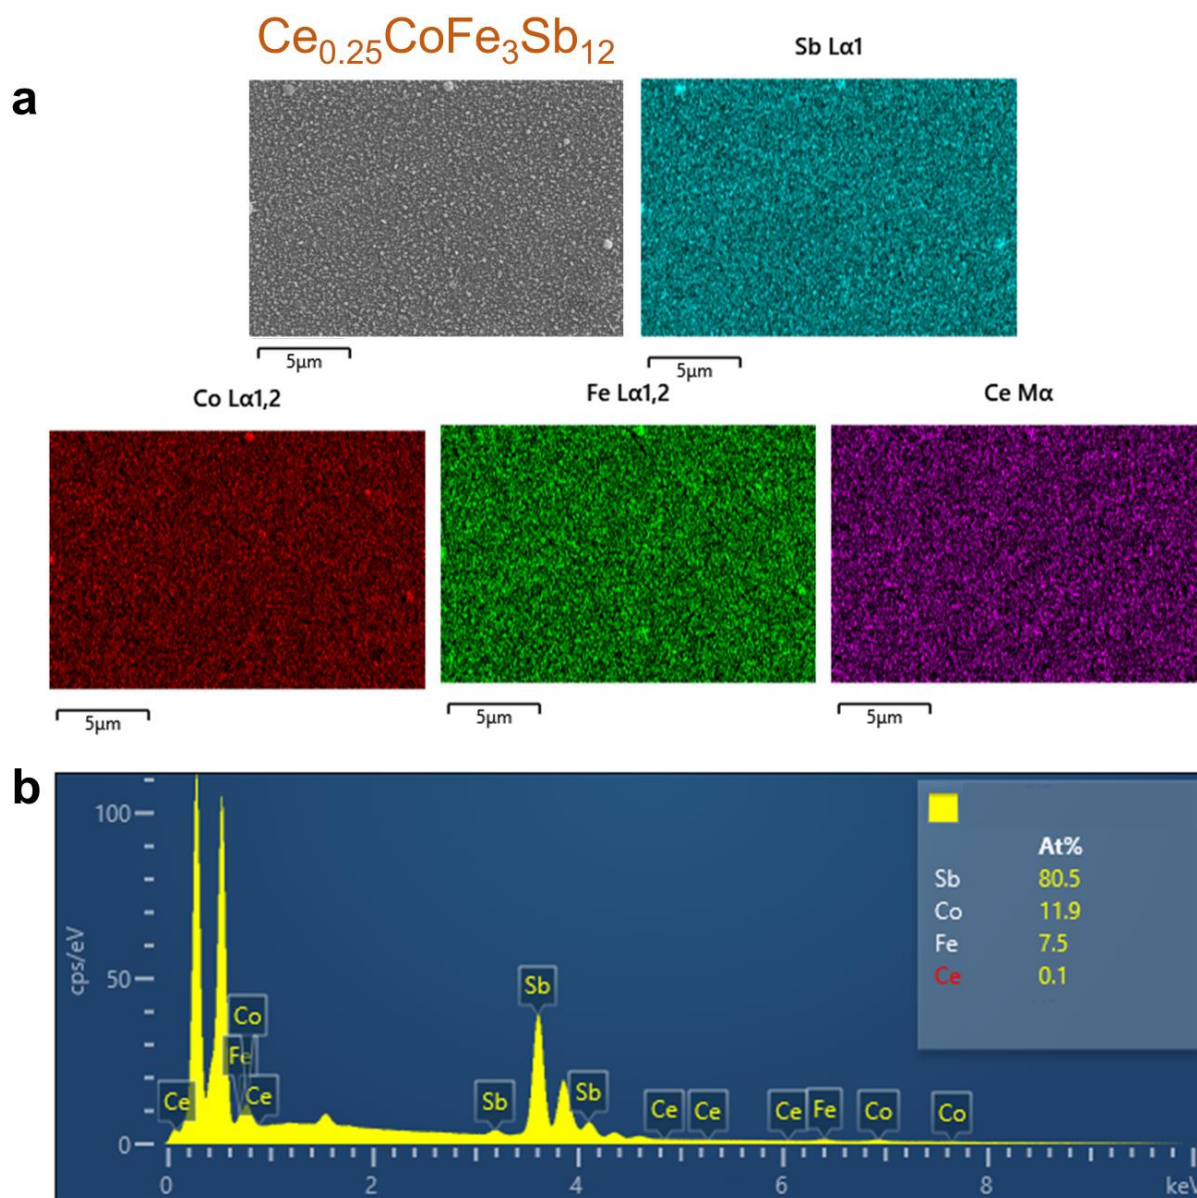

**Supplementary Fig. 6** The surface morphology and composition of  $Ce_{0.25}Fe_3CoSb_{12}$  skutterudite thin film. **(a)** SEM image of  $Ce_{0.25}Fe_3CoSb_{12}$  skutterudite thin film from a top view and corresponding EDS maps for Sb, Co, Fe, and Ce. **(b)** Corresponding EDS composition results taken from the EDS maps.

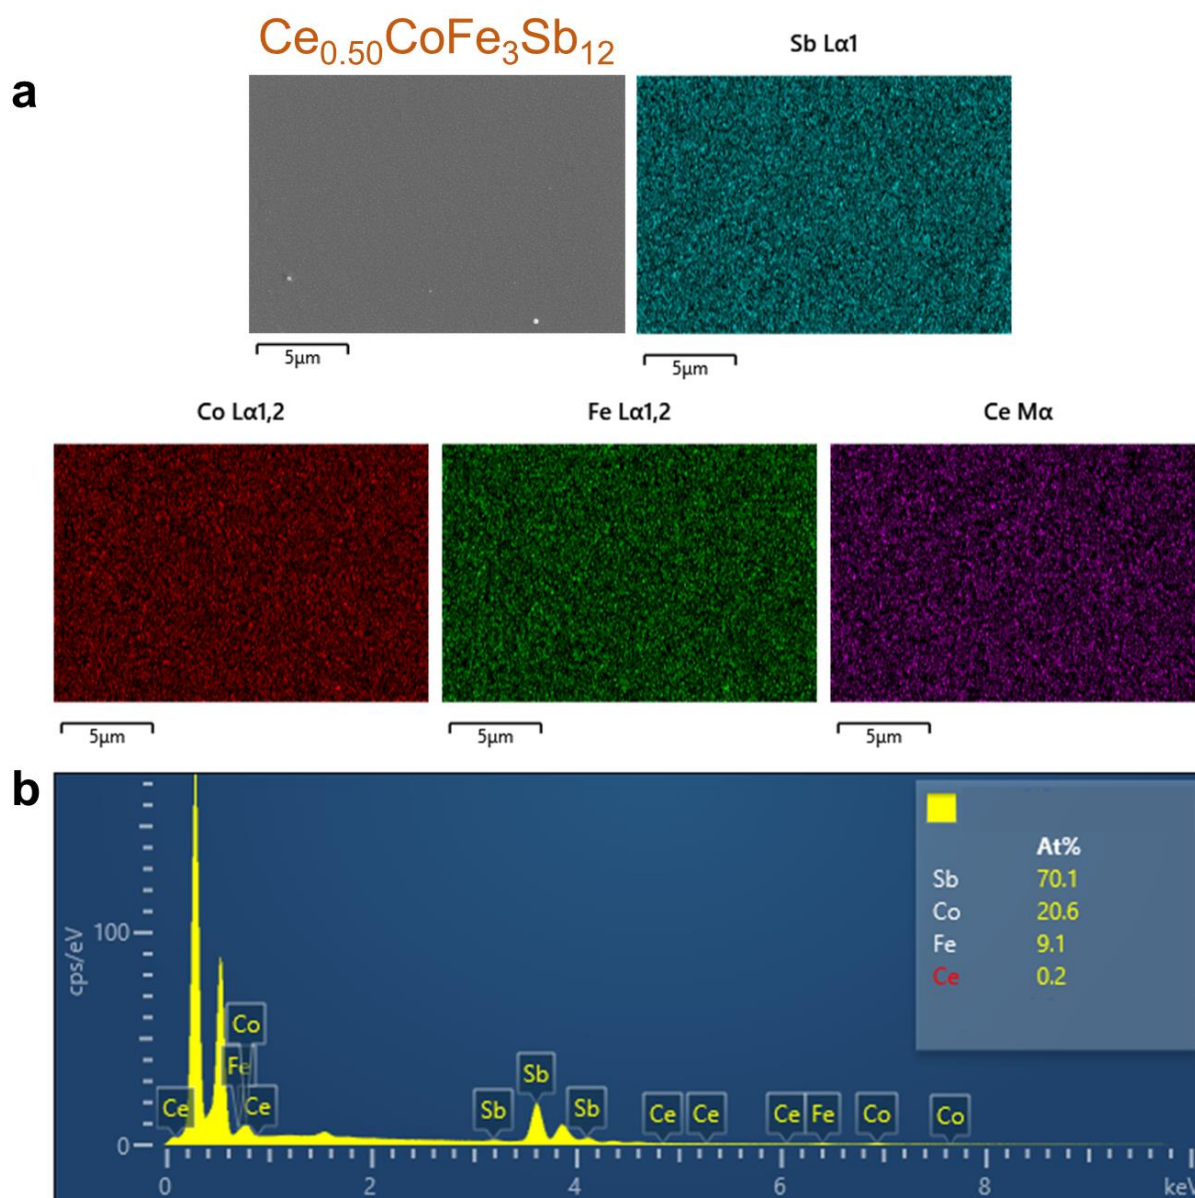

**Supplementary Fig. 7** The surface morphology and composition of  $Ce_{0.50}Fe_3CoSb_{12}$  skutterudite thin film. **(a)** SEM image of  $Ce_{0.50}Fe_3CoSb_{12}$  skutterudite thin film from a top view and corresponding EDS maps for Sb, Co, Fe, and Ce. **(b)** Corresponding EDS composition results taken from the EDS maps.

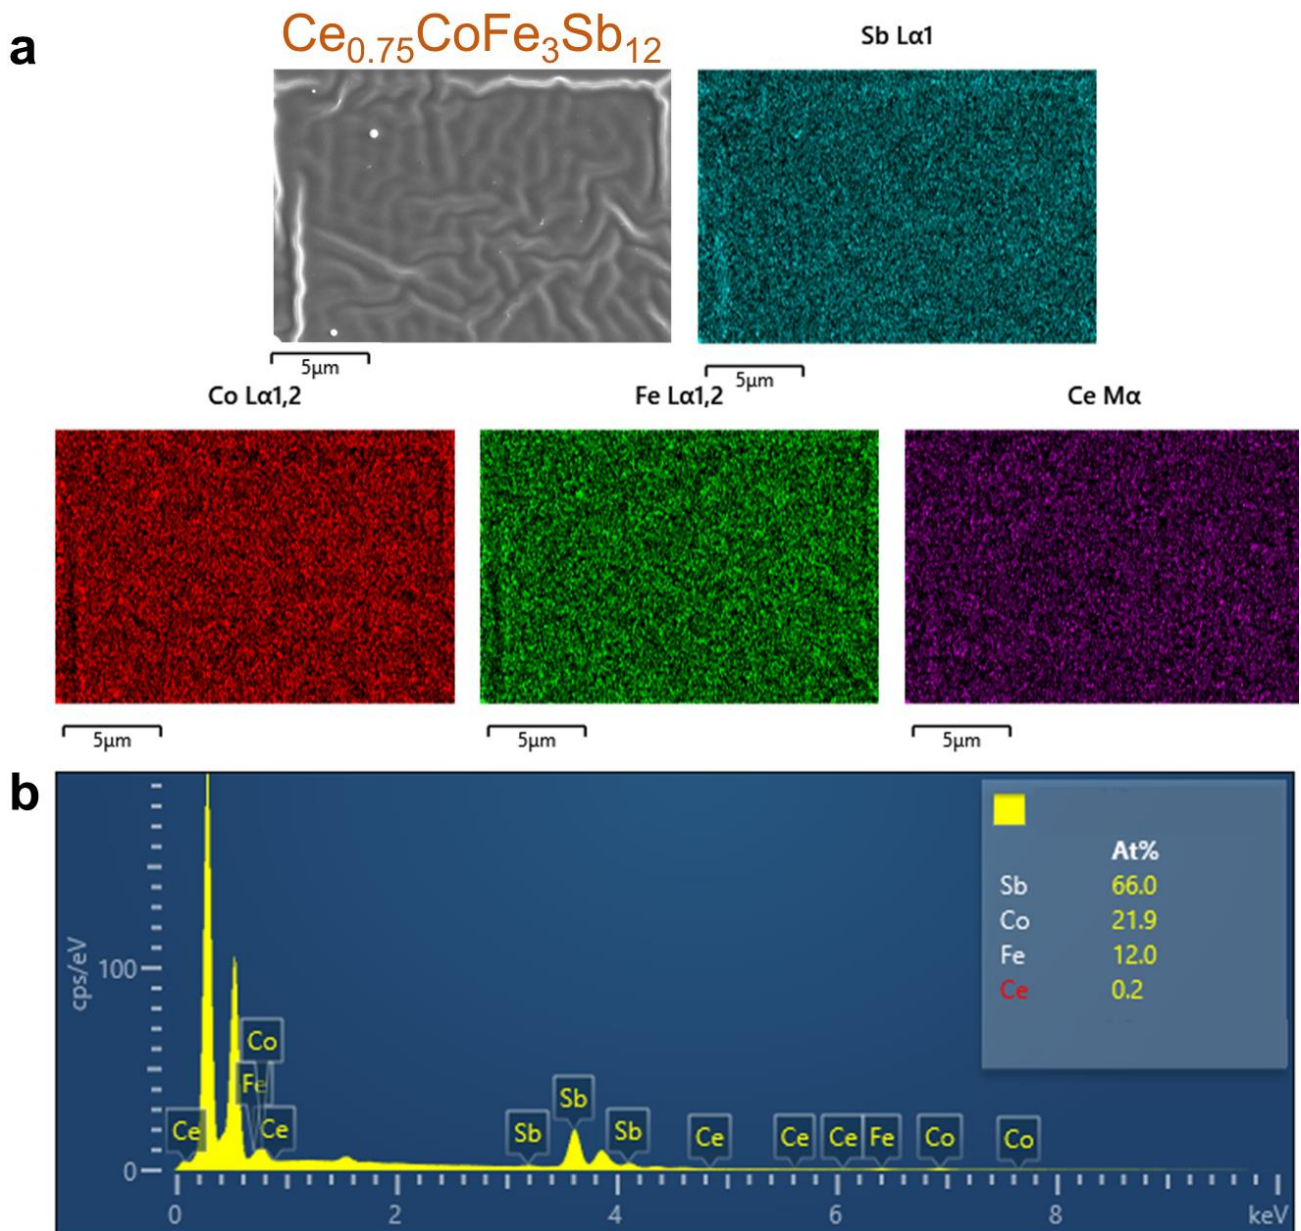

**Supplementary Fig. 8** The surface morphology and composition of  $Ce_{0.75}Fe_3CoSb_{12}$  skutterudite thin film. **(a)** SEM image of  $Ce_{0.75}Fe_3CoSb_{12}$  skutterudite thin film from a top view and corresponding EDS maps for Sb, Co, Fe, and Ce. **(b)** Corresponding EDS composition results taken from the EDS maps.

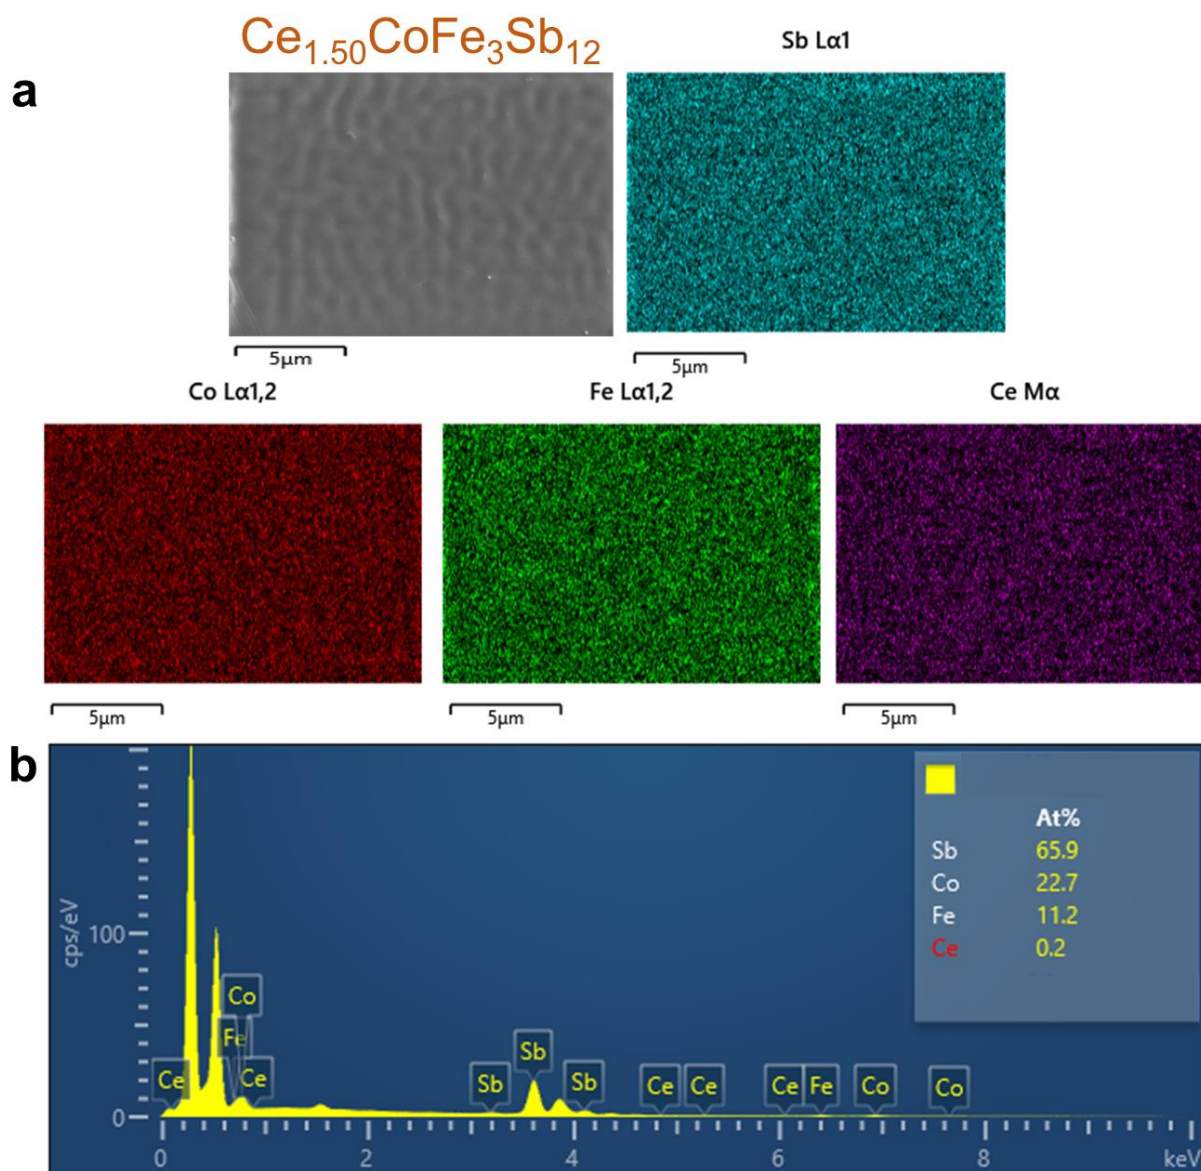

**Supplementary Fig. 9** The surface morphology and composition of  $Ce_{1.50}Fe_3CoSb_{12}$  skutterudite thin film. **(a)** SEM image of  $Ce_{1.50}Fe_3CoSb_{12}$  skutterudite thin film from a top view and corresponding EDS maps for Sb, Co, Fe, and Ce. **(b)** Corresponding EDS composition results taken from the EDS maps.

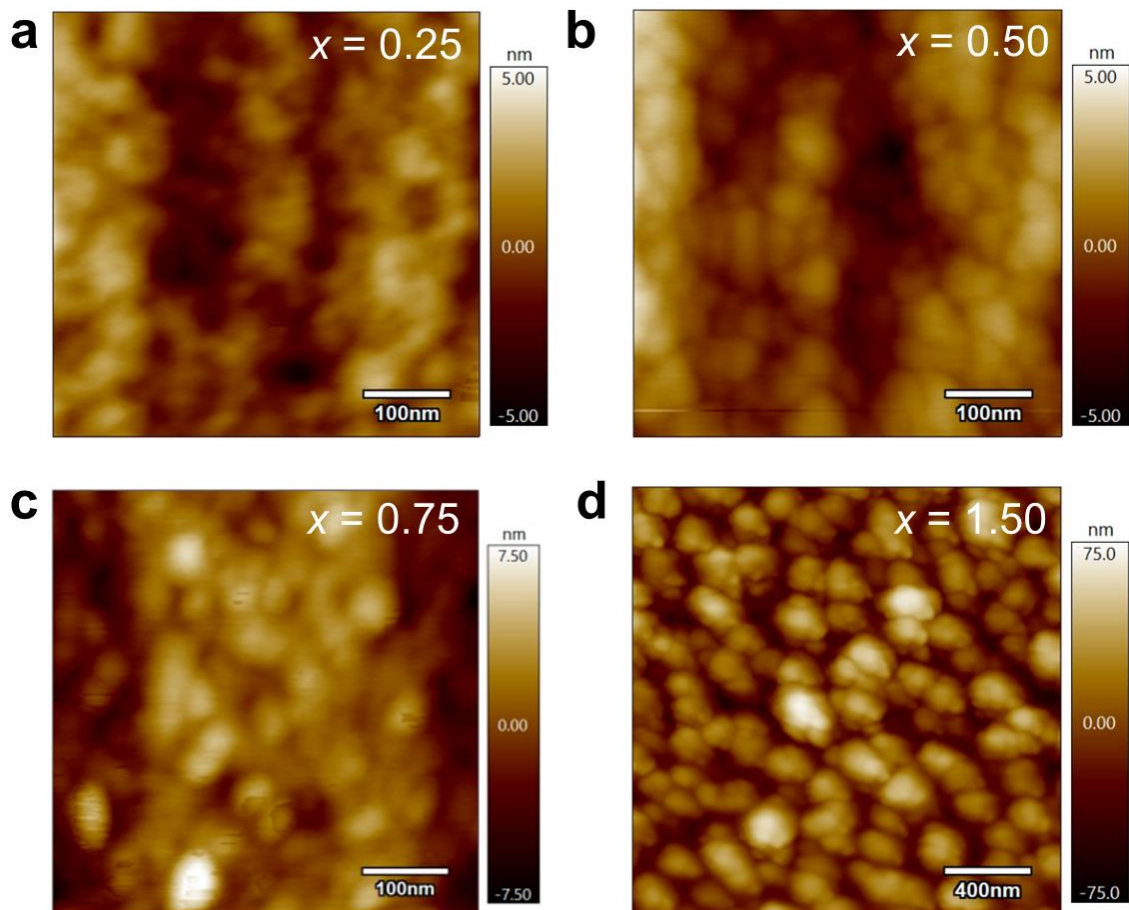

**Supplementary Fig. 10** Atomic force microscopy (AFM) images of  $\text{Ce}_x\text{Fe}_3\text{CoSb}_{12}$  thin films. (a)  $x = 0.25$ , (b)  $x = 0.50$ , (c)  $x = 0.75$ , and (d)  $x = 1.50$ .

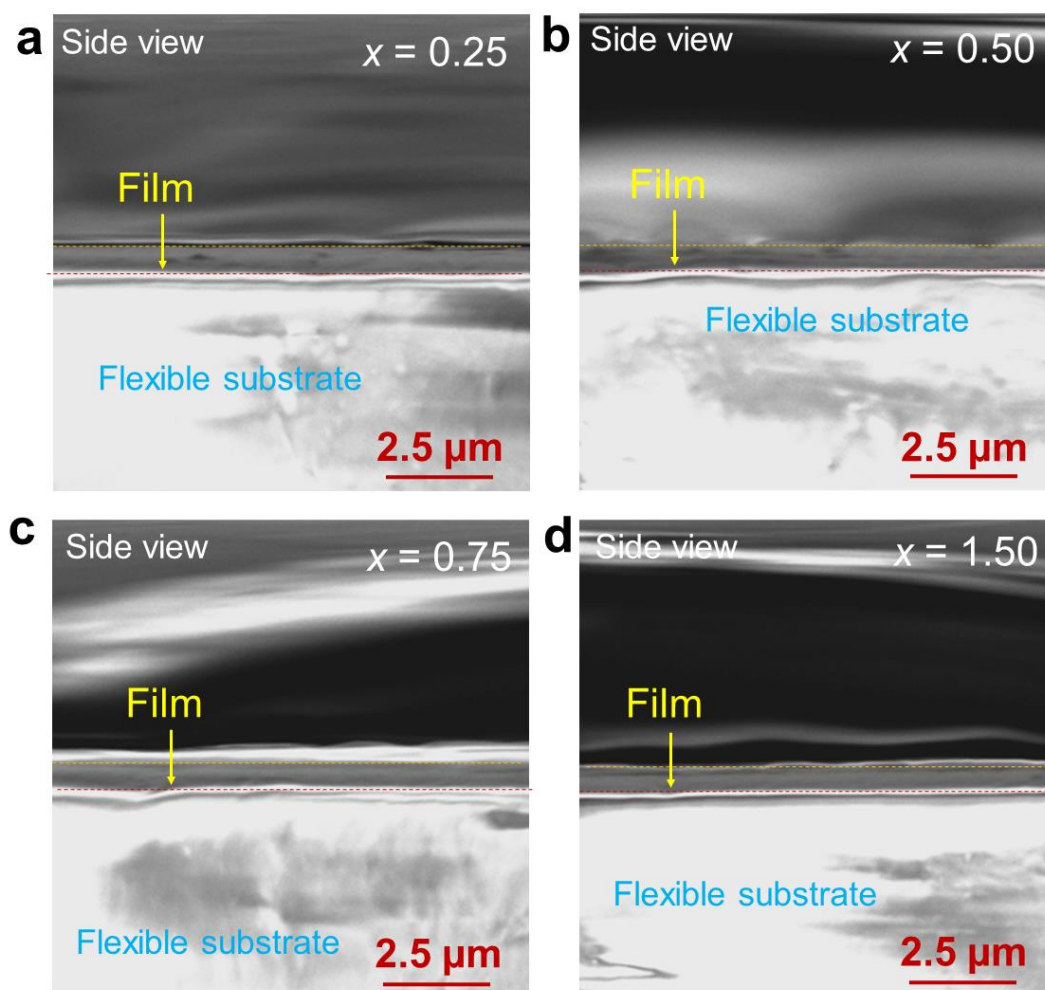

**Supplementary Fig. 11** SEM images of  $\text{Ce}_x\text{Fe}_3\text{CoSb}_{12}$  thin films from cross-sectional views. (a)  $x = 0.25$ , (b)  $x = 0.50$ , (c)  $x = 0.75$ , and (d)  $x = 1.50$ .

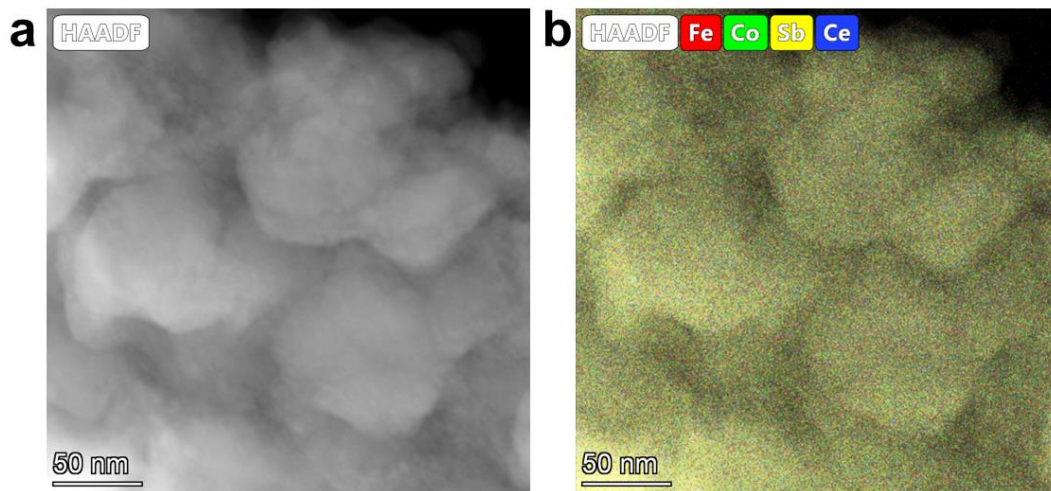

**Supplementary Fig. 12** The microstructure and composition of  $\text{Ce}_{1.25}\text{Fe}_3\text{CoSb}_{12}$  skutterudite thin film.

(a) Transmission electron microscopy (TEM) high-angle annular dark-field (HAADF) image of the  $\text{Ce}_{1.25}\text{Fe}_3\text{CoSb}_{12}$  thin film and (b) corresponding EDS map for overlapping elements.

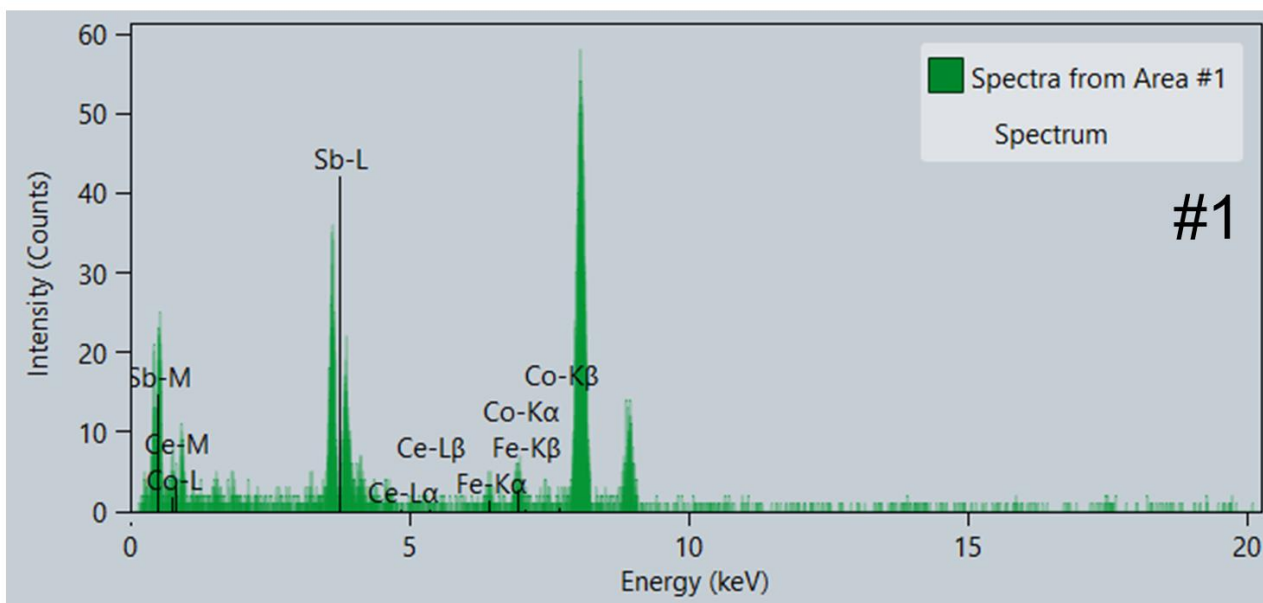

| Element | Family | Atomic Fraction (%) | Atomic Error (%) | Mass Fraction (%) | Mass Error (%) | Fit error (%) |
|---------|--------|---------------------|------------------|-------------------|----------------|---------------|
| Fe      | K      | 6.11                | 1.27             | 3.10              | 0.49           | 10.73         |
| Co      | K      | 12.25               | 2.73             | 6.55              | 1.17           | 6.58          |
| Sb      | L      | 80.65               | 16.01            | 89.09             | 13.09          | 0.86          |
| Ce      | L      | 0.99                | 0.40             | 1.26              | 0.48           | 35.67         |

**Supplementary Fig. 13** Detailed EDS spot result for #1 taken from **Fig. 3a**.



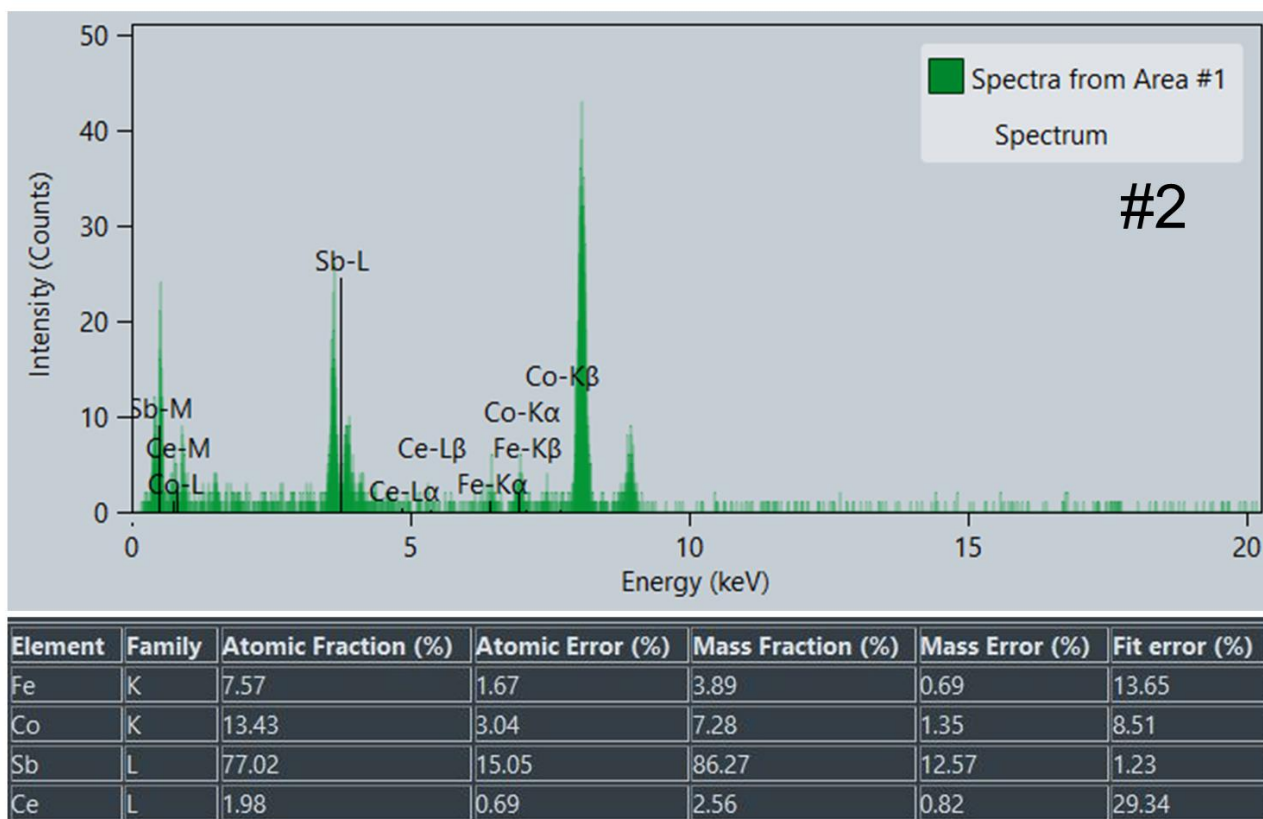

**Supplementary Fig. 14** Detailed EDS spot result for #2 taken from **Fig. 3a**.

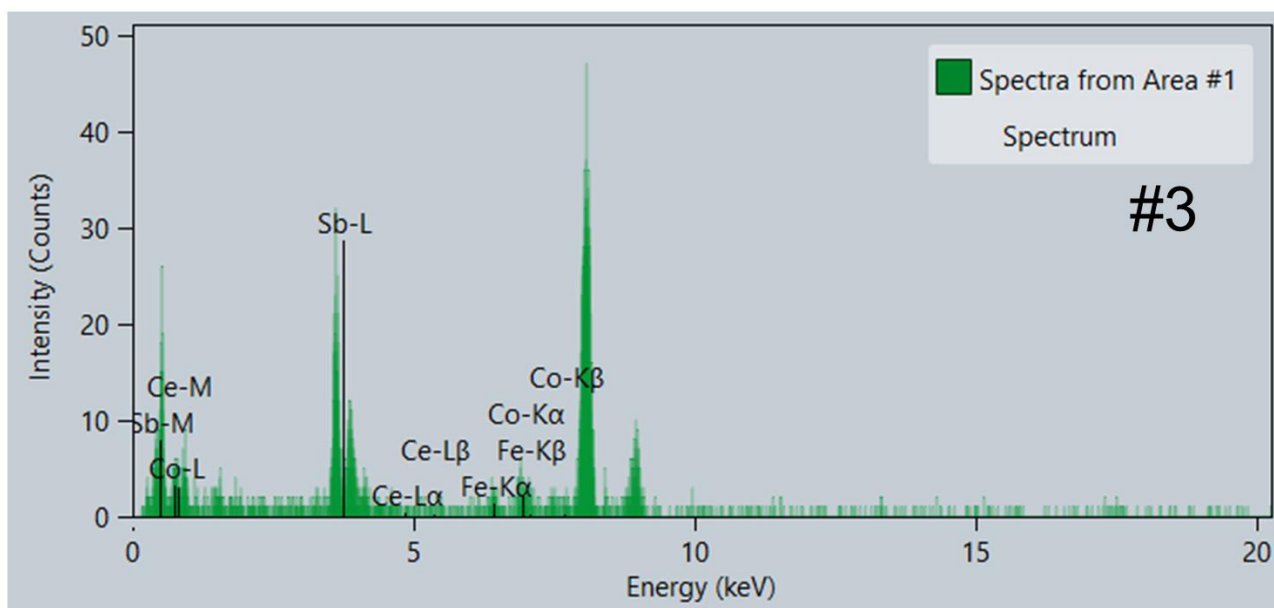

| Element | Family | Atomic Fraction (%) | Atomic Error (%) | Mass Fraction (%) | Mass Error (%) | Fit error (%) |
|---------|--------|---------------------|------------------|-------------------|----------------|---------------|
| Fe      | K      | 8.10                | 1.68             | 4.16              | 0.67           | 11.24         |
| Co      | K      | 12.58               | 2.84             | 6.81              | 1.25           | 8.18          |
| Sb      | L      | 77.79               | 15.24            | 87.06             | 12.71          | 1.12          |
| Ce      | L      | 1.53                | 0.57             | 1.97              | 0.69           | 32.59         |

**Supplementary Fig. 15** Detailed EDS spot result for #3 taken from **Fig. 3a**.

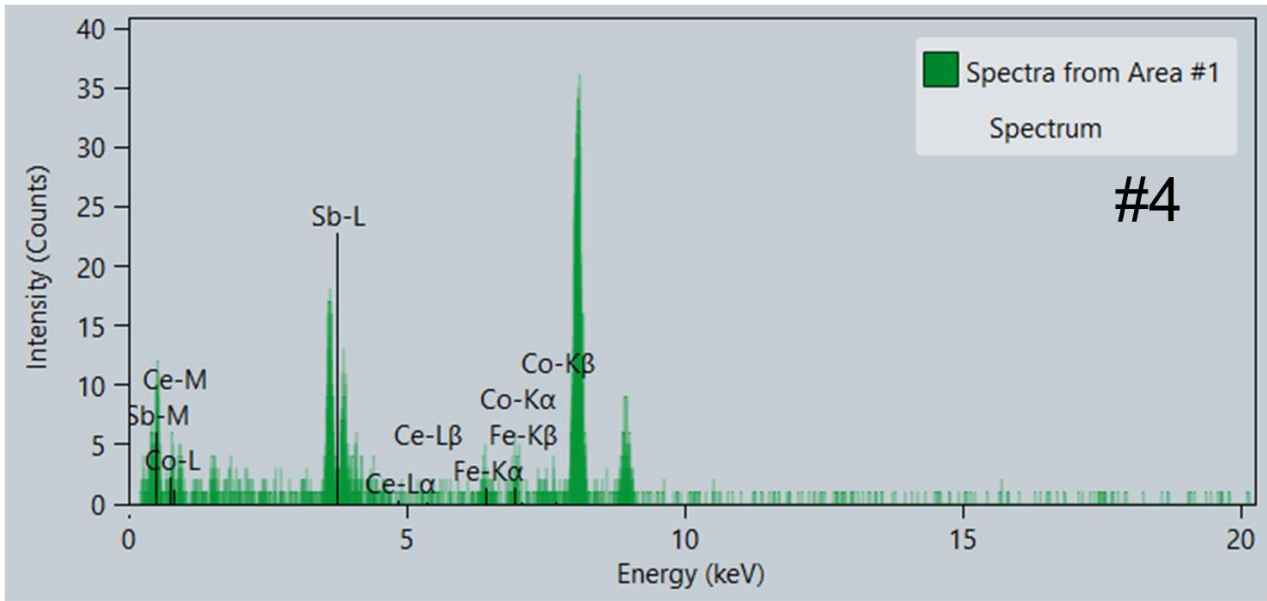

| Element | Family | Atomic Fraction (%) | Atomic Error (%) | Mass Fraction (%) | Mass Error (%) | Fit error (%) |
|---------|--------|---------------------|------------------|-------------------|----------------|---------------|
| Fe      | K      | 10.45               | 2.15             | 5.38              | 0.85           | 10.89         |
| Co      | K      | 10.64               | 2.54             | 5.78              | 1.15           | 11.36         |
| Sb      | L      | 77.15               | 15.10            | 86.57             | 12.64          | 1.36          |
| Ce      | L      | 1.76                | 0.71             | 2.28              | 0.86           | 35.66         |

**Supplementary Fig. 16** Detailed EDS spot result for #4 taken from **Fig. 3a**.

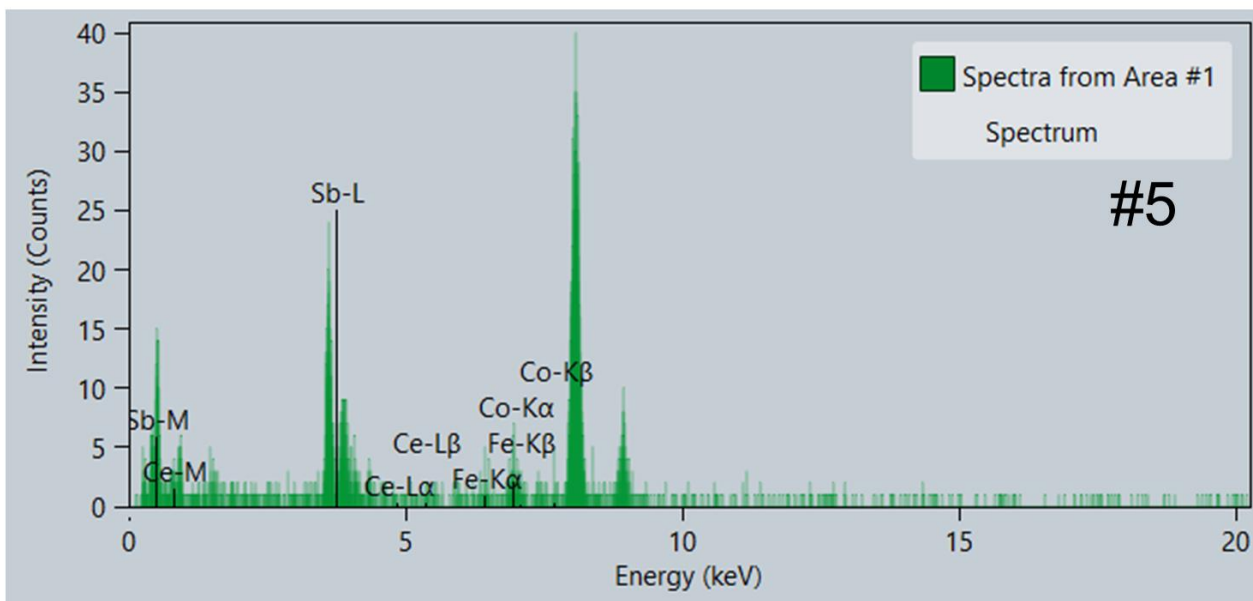

| Element | Family | Atomic Fraction (%) | Atomic Error (%) | Mass Fraction (%) | Mass Error (%) | Fit error (%) |
|---------|--------|---------------------|------------------|-------------------|----------------|---------------|
| Fe      | K      | 5.84                | 1.43             | 3.00              | 0.62           | 17.17         |
| Co      | K      | 15.27               | 3.40             | 8.28              | 1.50           | 7.55          |
| Sb      | L      | 77.03               | 15.08            | 86.32             | 12.58          | 1.22          |
| Ce      | L      | 1.86                | 0.67             | 2.40              | 0.80           | 30.57         |

**Supplementary Fig. 17** Detailed EDS spot result for #5 taken from **Fig. 3a**.

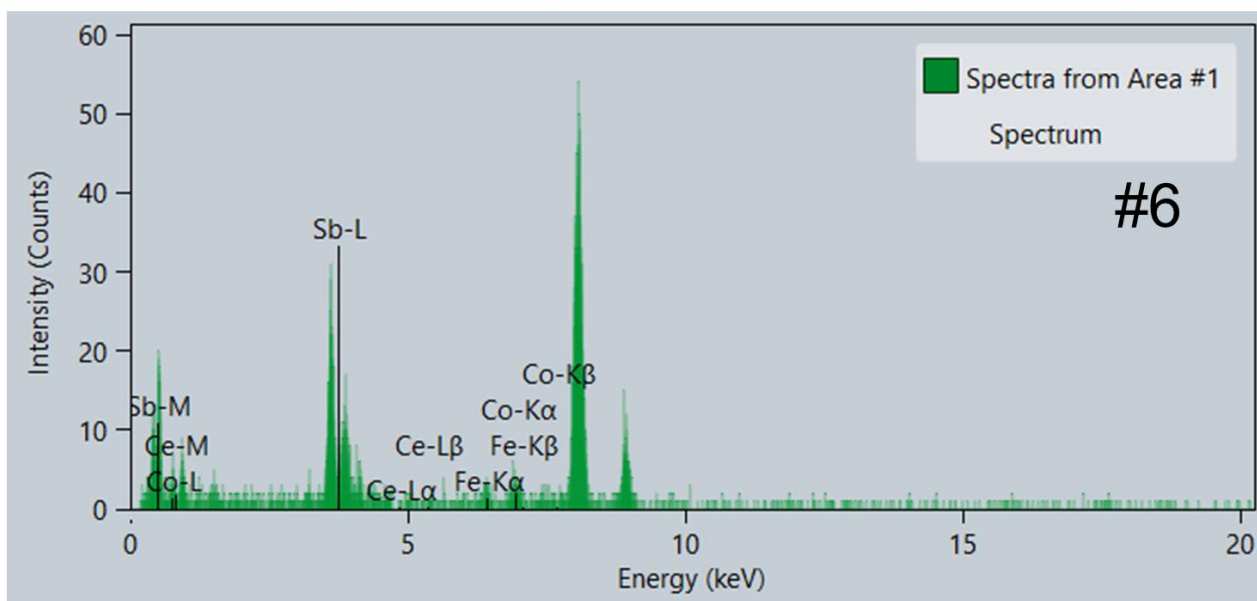

| Element | Family | Atomic Fraction (%) | Atomic Error (%) | Mass Fraction (%) | Mass Error (%) | Fit error (%) |
|---------|--------|---------------------|------------------|-------------------|----------------|---------------|
| Fe      | K      | 7.46                | 1.54             | 3.80              | 0.60           | 10.77         |
| Co      | K      | 11.64               | 2.63             | 6.25              | 1.14           | 7.76          |
| Sb      | L      | 79.86               | 15.81            | 88.63             | 13.01          | 1.04          |
| Ce      | L      | 1.03                | 0.48             | 1.32              | 0.59           | 42.91         |

**Supplementary Fig. 18** Detailed EDS spot result for #6 taken from **Fig. 3a**.

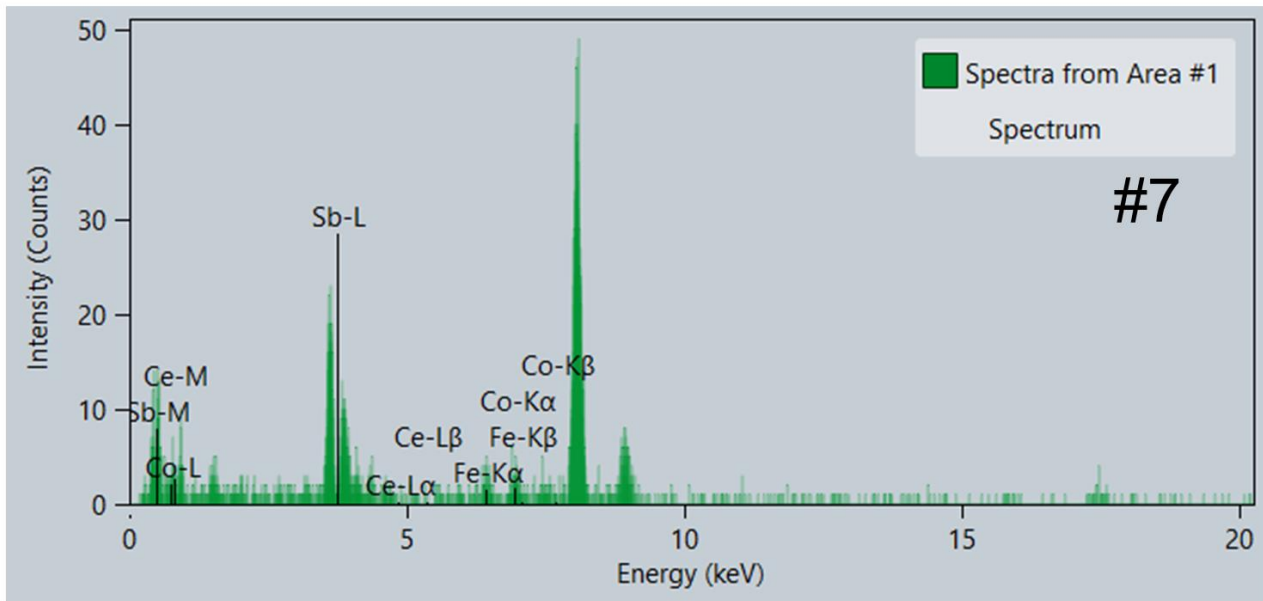

| Element | Family | Atomic Fraction (%) | Atomic Error (%) | Mass Fraction (%) | Mass Error (%) | Fit error (%) |
|---------|--------|---------------------|------------------|-------------------|----------------|---------------|
| Fe      | K      | 9.57                | 1.94             | 4.91              | 0.76           | 10.15         |
| Co      | K      | 10.77               | 2.48             | 5.83              | 1.10           | 9.27          |
| Sb      | L      | 78.50               | 15.43            | 87.77             | 12.84          | 1.01          |
| Ce      | L      | 1.16                | 0.55             | 1.49              | 0.68           | 43.97         |

**Supplementary Fig. 19** Detailed EDS spot result for #7 taken from **Fig. 3a**.

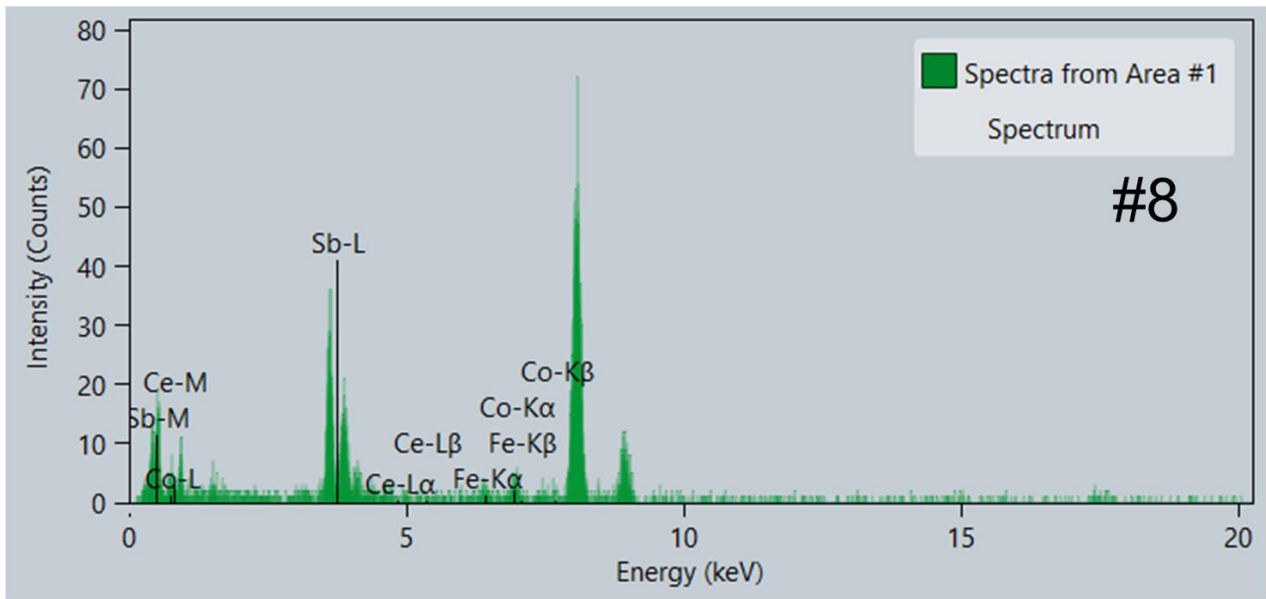

| Element | Family | Atomic Fraction (%) | Atomic Error (%) | Mass Fraction (%) | Mass Error (%) | Fit error (%) |
|---------|--------|---------------------|------------------|-------------------|----------------|---------------|
| Fe      | K      | 5.77                | 1.25             | 2.88              | 0.49           | 12.04         |
| Co      | K      | 10.03               | 2.29             | 5.29              | 0.97           | 7.72          |
| Sb      | L      | 83.05               | 16.68            | 90.39             | 13.37          | 0.98          |
| Ce      | L      | 1.15                | 0.44             | 1.44              | 0.51           | 32.78         |

**Supplementary Fig. 20** Detailed EDS spot result for #8 taken from **Fig. 3a**.

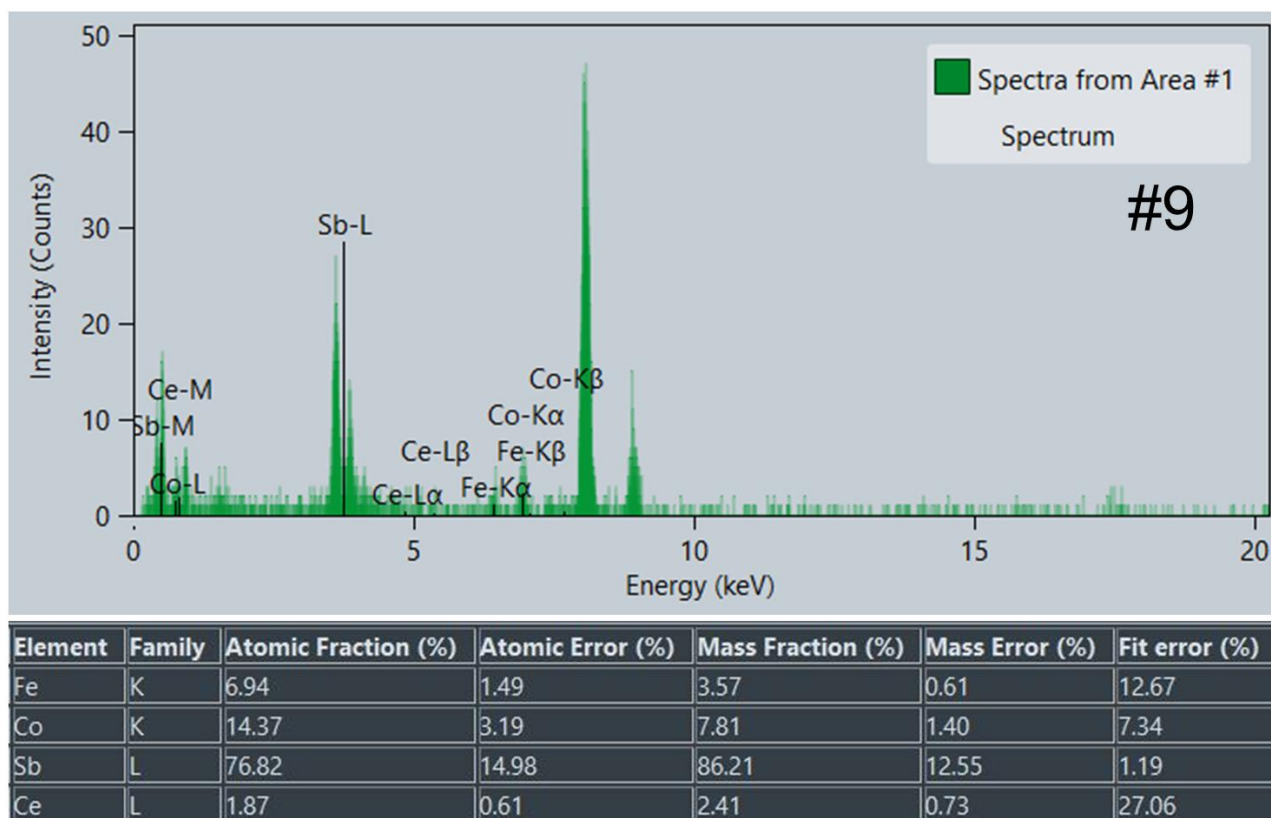

**Supplementary Fig. 21** Detailed EDS spot result for #9 taken from **Fig. 3a**.



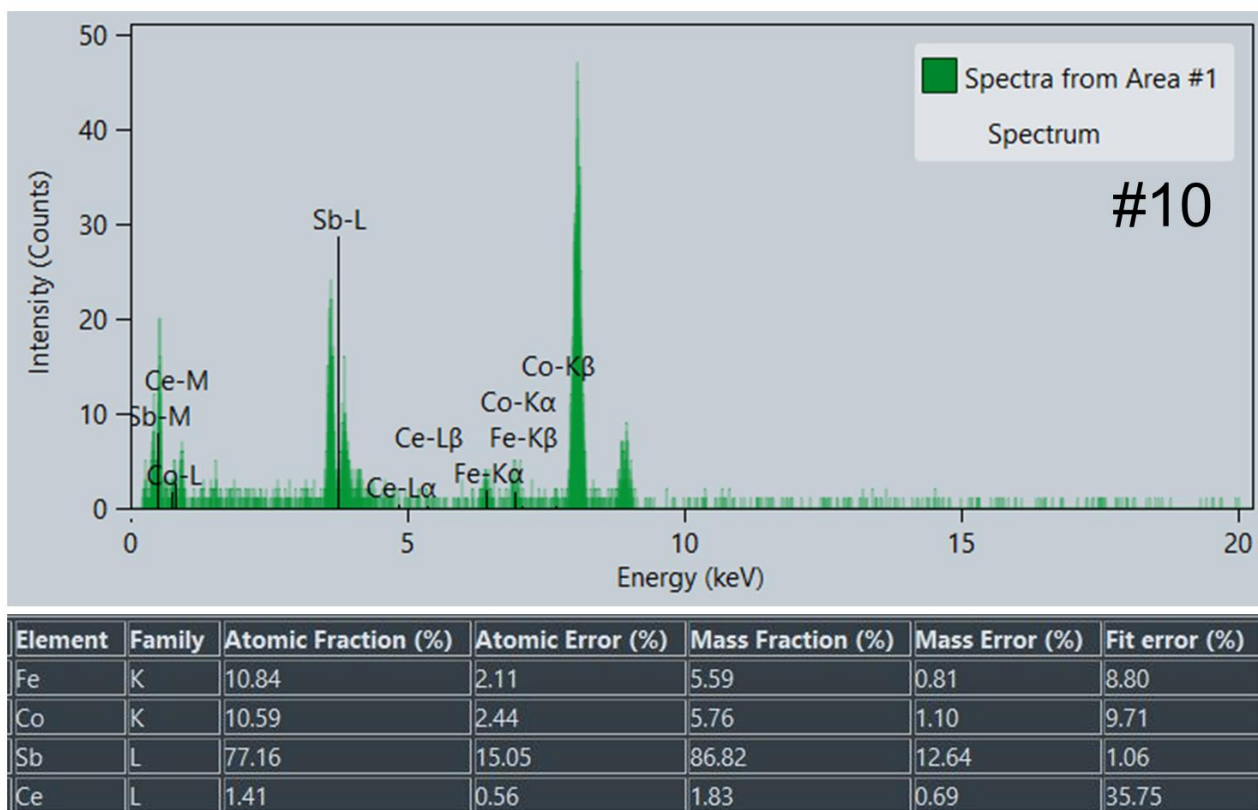

Supplementary Fig. 22 Detailed EDS spot result for #10 taken from Fig. 3a.

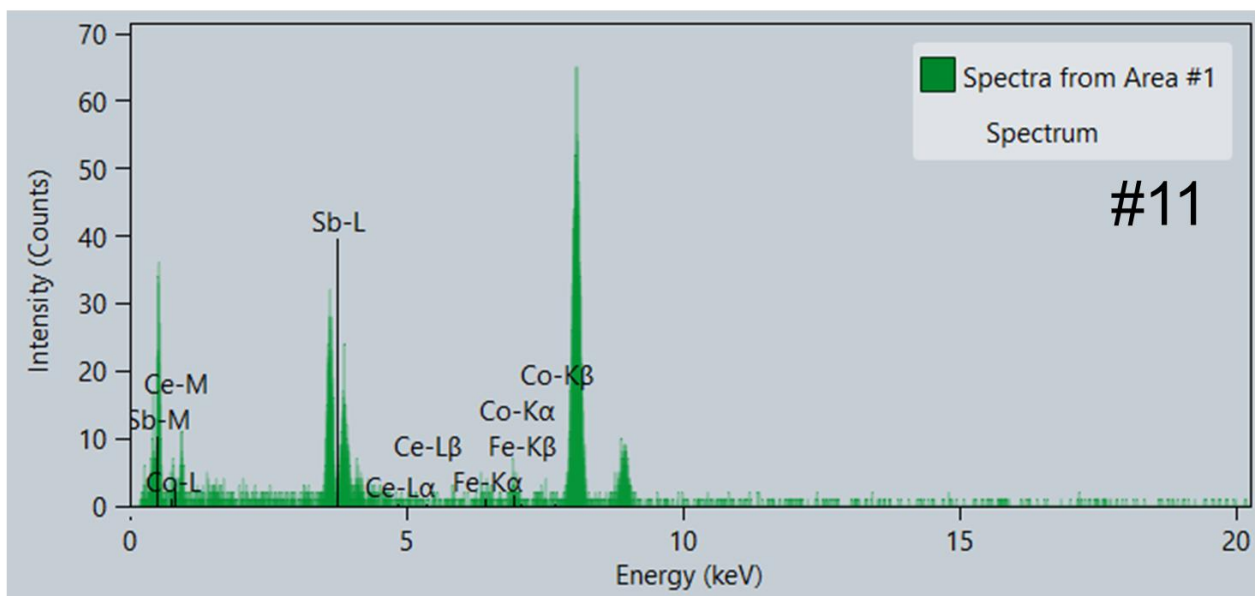

| Element | Family | Atomic Fraction (%) | Atomic Error (%) | Mass Fraction (%) | Mass Error (%) | Fit error (%) |
|---------|--------|---------------------|------------------|-------------------|----------------|---------------|
| Fe      | K      | 5.24                | 1.19             | 2.58              | 0.47           | 13.59         |
| Co      | K      | 8.11                | 1.92             | 4.21              | 0.81           | 9.65          |
| Sb      | L      | 85.36               | 17.33            | 91.61             | 13.62          | 0.88          |
| Ce      | L      | 1.29                | 0.47             | 1.59              | 0.54           | 30.86         |

**Supplementary Fig. 23** Detailed EDS spot result for #11 taken from **Fig. 3a**.

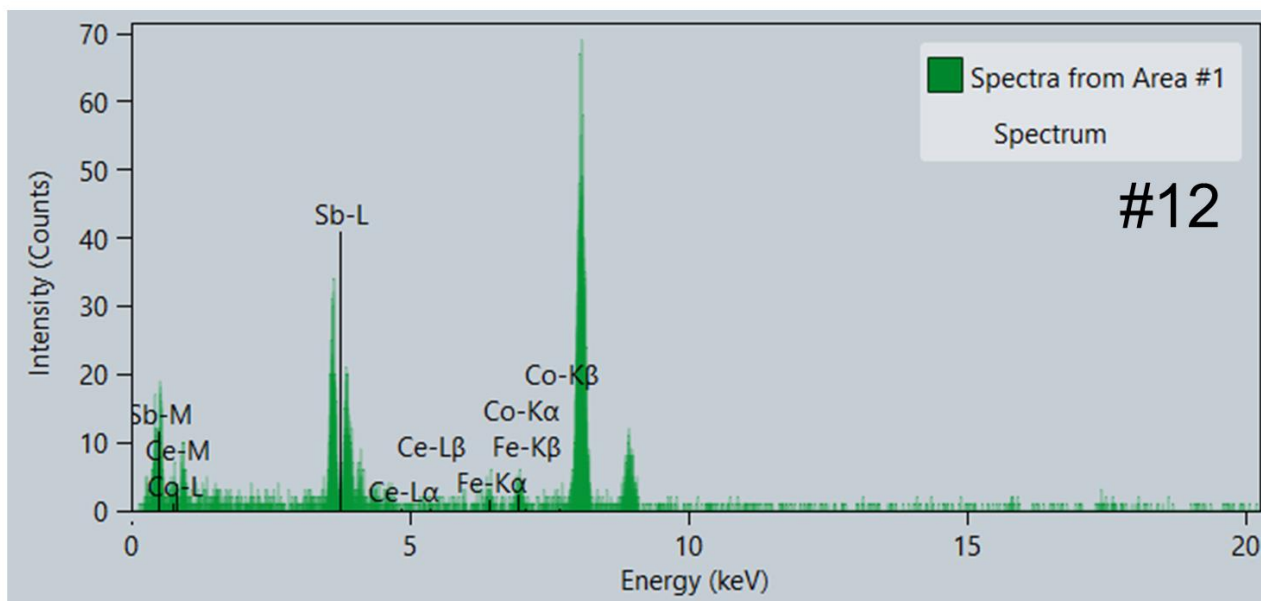

| Element | Family | Atomic Fraction (%) | Atomic Error (%) | Mass Fraction (%) | Mass Error (%) | Fit error (%) |
|---------|--------|---------------------|------------------|-------------------|----------------|---------------|
| Fe      | K      | 6.71                | 1.38             | 3.38              | 0.52           | 10.12         |
| Co      | K      | 10.54               | 2.37             | 5.60              | 1.01           | 7.08          |
| Sb      | L      | 81.76               | 16.33            | 89.77             | 13.24          | 1.00          |
| Ce      | L      | 0.98                | 0.41             | 1.24              | 0.49           | 37.69         |

Supplementary Fig. 24 Detailed EDS spot result for #12 taken from Fig. 3a.

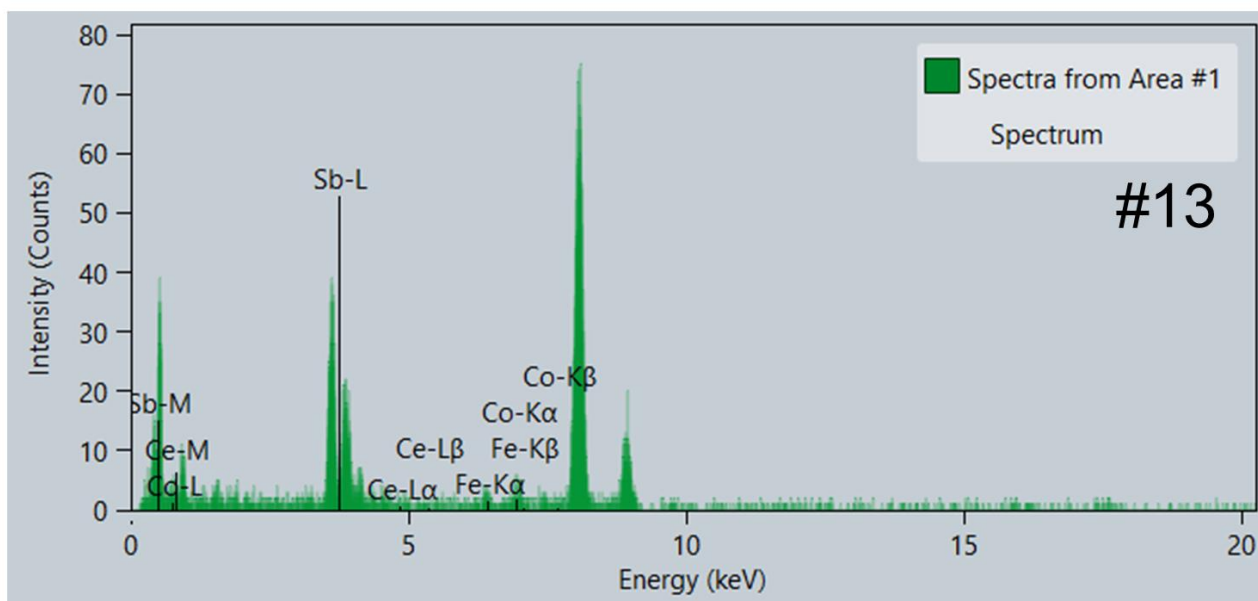

| Element | Family | Atomic Fraction (%) | Atomic Error (%) | Mass Fraction (%) | Mass Error (%) | Fit error (%) |
|---------|--------|---------------------|------------------|-------------------|----------------|---------------|
| Fe      | K      | 5.64                | 1.18             | 2.76              | 0.43           | 10.10         |
| Co      | K      | 6.81                | 1.62             | 3.52              | 0.68           | 9.63          |
| Sb      | L      | 86.10               | 17.50            | 91.94             | 13.67          | 0.81          |
| Ce      | L      | 1.44                | 0.42             | 1.77              | 0.45           | 21.09         |

**Supplementary Fig. 25** Detailed EDS spot result for #13 taken from **Fig. 3a**.

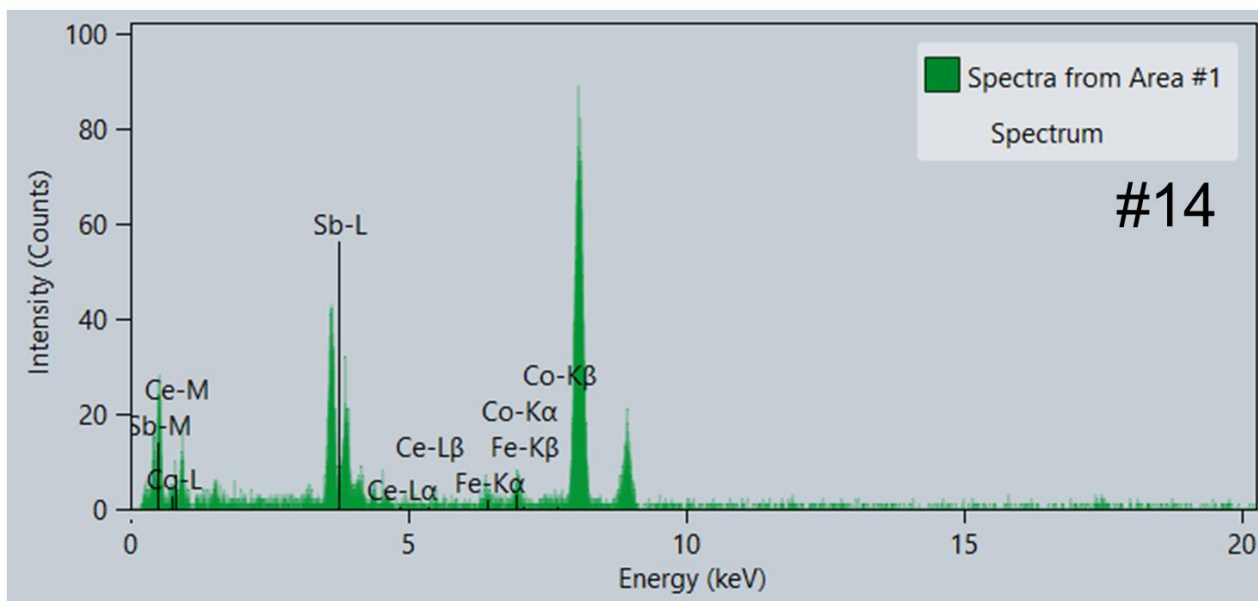

| Element | Family | Atomic Fraction (%) | Atomic Error (%) | Mass Fraction (%) | Mass Error (%) | Fit error (%) |
|---------|--------|---------------------|------------------|-------------------|----------------|---------------|
| Fe      | K      | 6.36                | 1.27             | 3.18              | 0.47           | 8.77          |
| Co      | K      | 9.64                | 2.16             | 5.09              | 0.91           | 6.34          |
| Sb      | L      | 83.11               | 16.68            | 90.62             | 13.40          | 0.82          |
| Ce      | L      | 0.88                | 0.32             | 1.11              | 0.37           | 30.95         |

**Supplementary Fig. 26** Detailed EDS spot result for #14 taken from **Fig. 3a**.

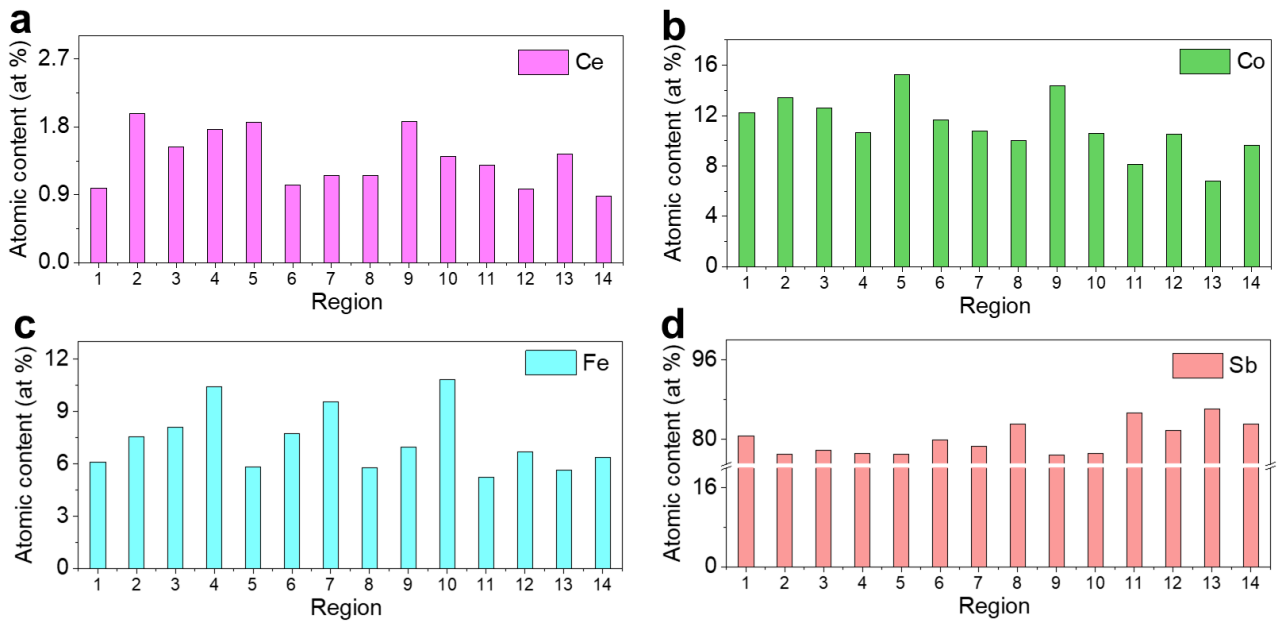

**Supplementary Fig. 27** Determined atomic contents of the thin film. Atomic contents of (a) Ce, (b) Co, (c) Fe, and (d) Sb obtained within different EDS spot regions in **Fig. 3a**.

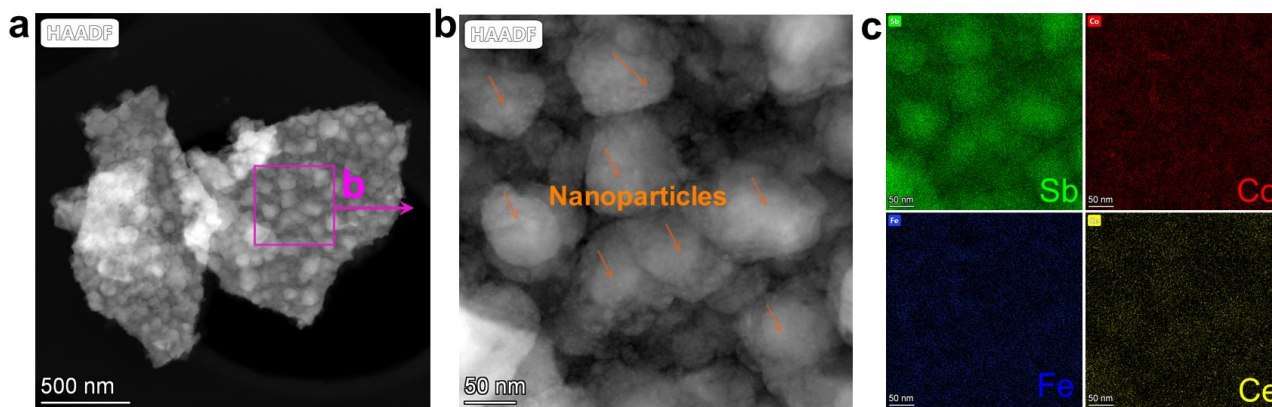

**Supplementary Fig. 28** The microstructure and composition of  $\text{Ce}_{1.25}\text{Fe}_3\text{CoSb}_{12}$  skutterudite thin film.

(a) Low-magnification TEM image of a fragment taken from the  $\text{Ce}_{1.25}\text{Fe}_3\text{CoSb}_{12}$  flexible thin film.

(b) TEM image magnified from **a** and (c) corresponding EDS maps for Sb, Co, Fe, and Ce.

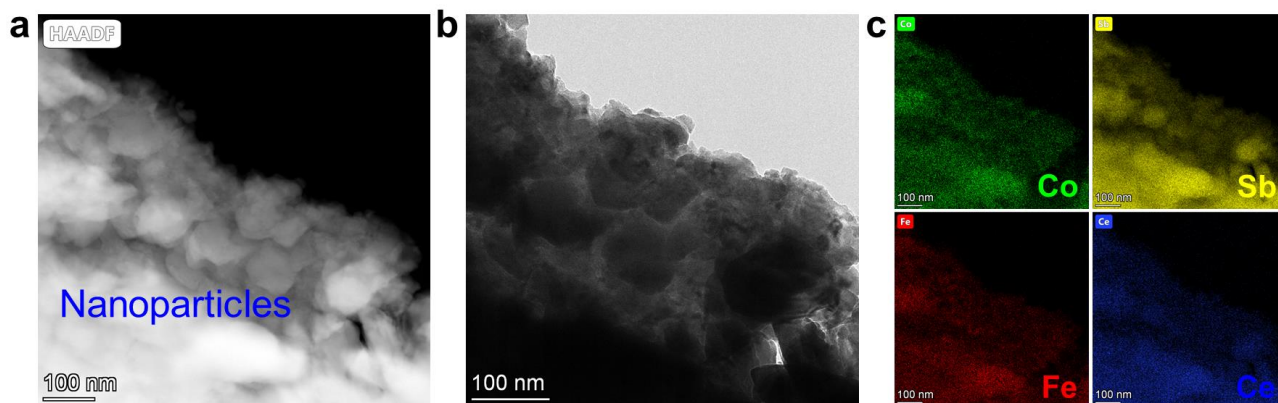

**Supplementary Fig. 29** The microstructure and composition of  $\text{Ce}_{1.25}\text{Fe}_3\text{CoSb}_{12}$  skutterudite thin film.

(a) HAADF and (b) bright-field (BF) TEM images of a fragment taken from the  $\text{Ce}_{1.25}\text{Fe}_3\text{CoSb}_{12}$  flexible thin film. (c) Corresponding EDS maps for Co, Sb, Fe, and Ce.



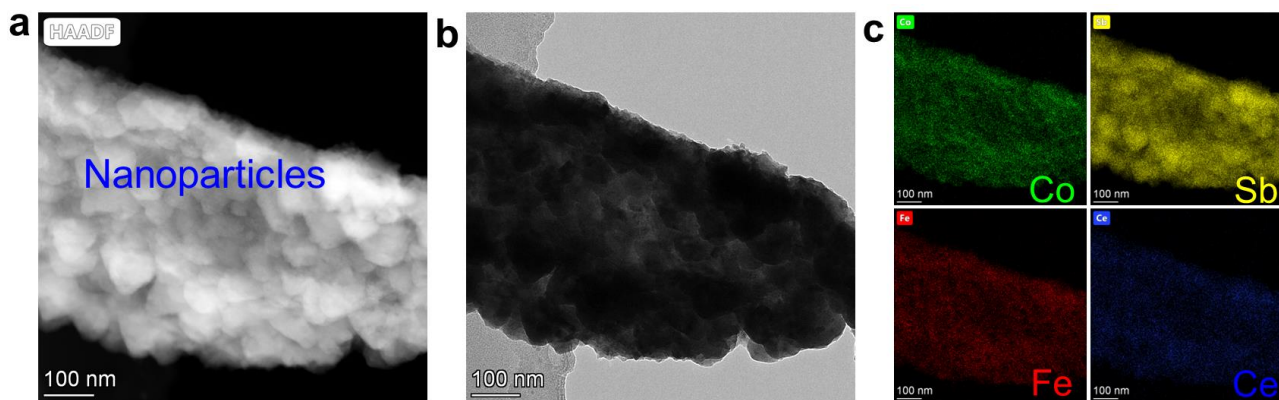

**Supplementary Fig. 30** The microstructure and composition of  $\text{Ce}_{1.25}\text{Fe}_3\text{CoSb}_{12}$  skutterudite thin film.

(a) HAADF and (b) BF TEM images of a fragment taken from the  $\text{Ce}_{1.25}\text{Fe}_3\text{CoSb}_{12}$  flexible thin film.

(c) Corresponding EDS maps for Co, Sb, Fe, and Ce.

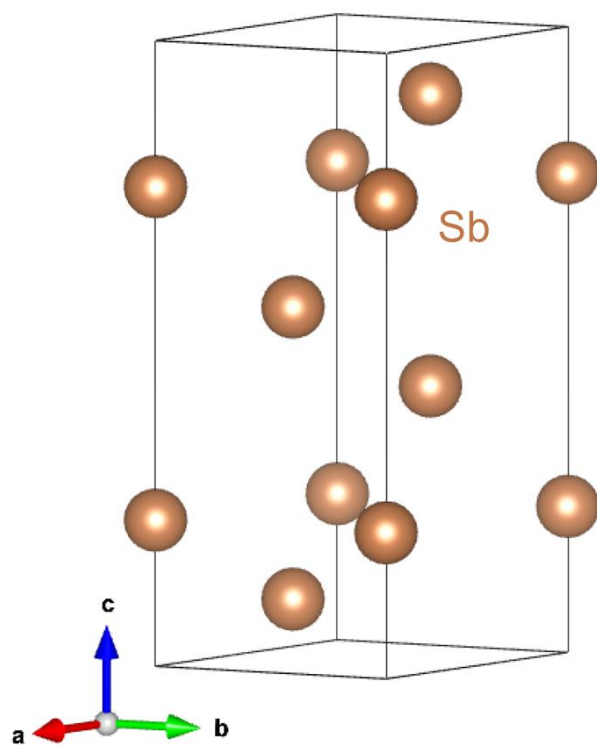

**Supplementary Fig. 31** Unit cell of Sb element.

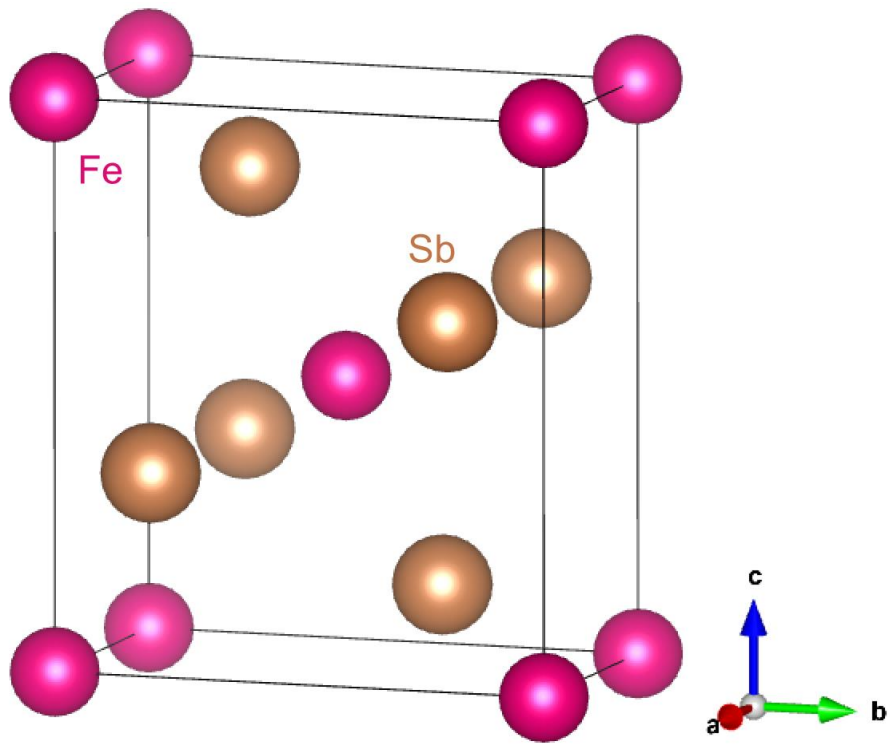

**Supplementary Fig. 32** Unit cell of FeSb<sub>2</sub>.

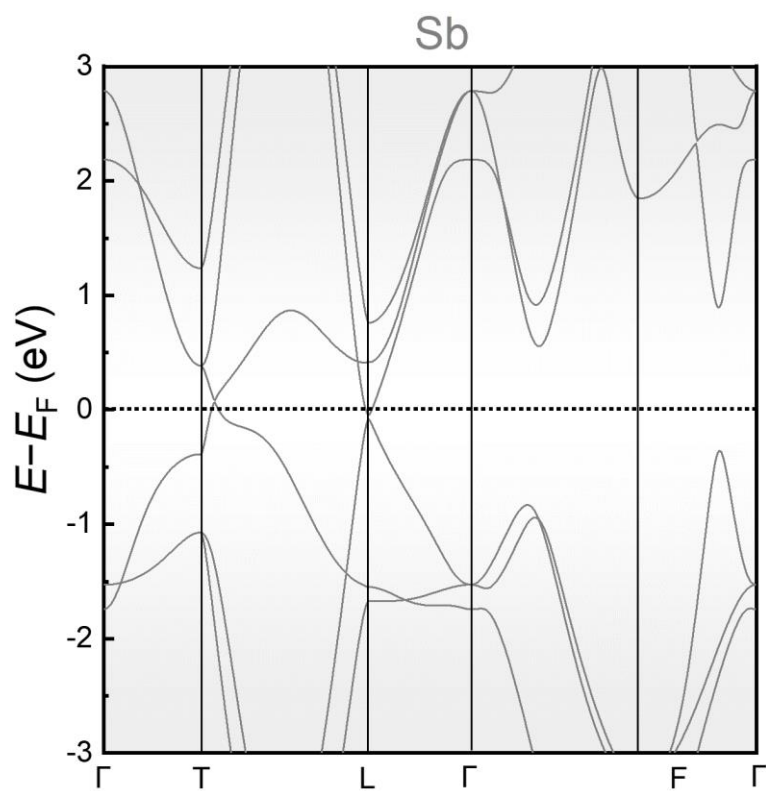

**Supplementary Fig. 33** Calculated band structure of Sb element.

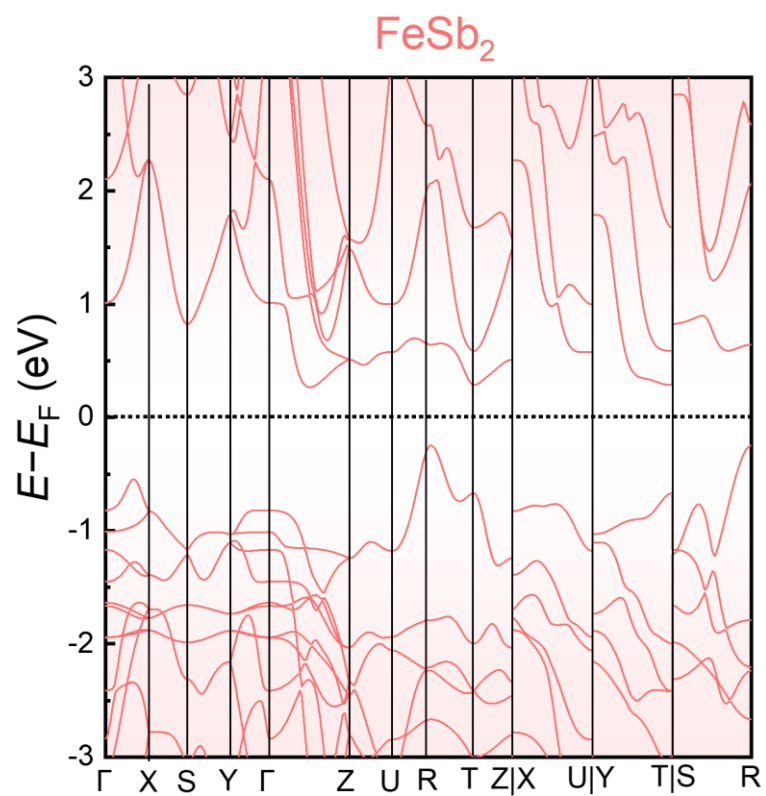

**Supplementary Fig. 34** Calculated band structure of FeSb<sub>2</sub>.

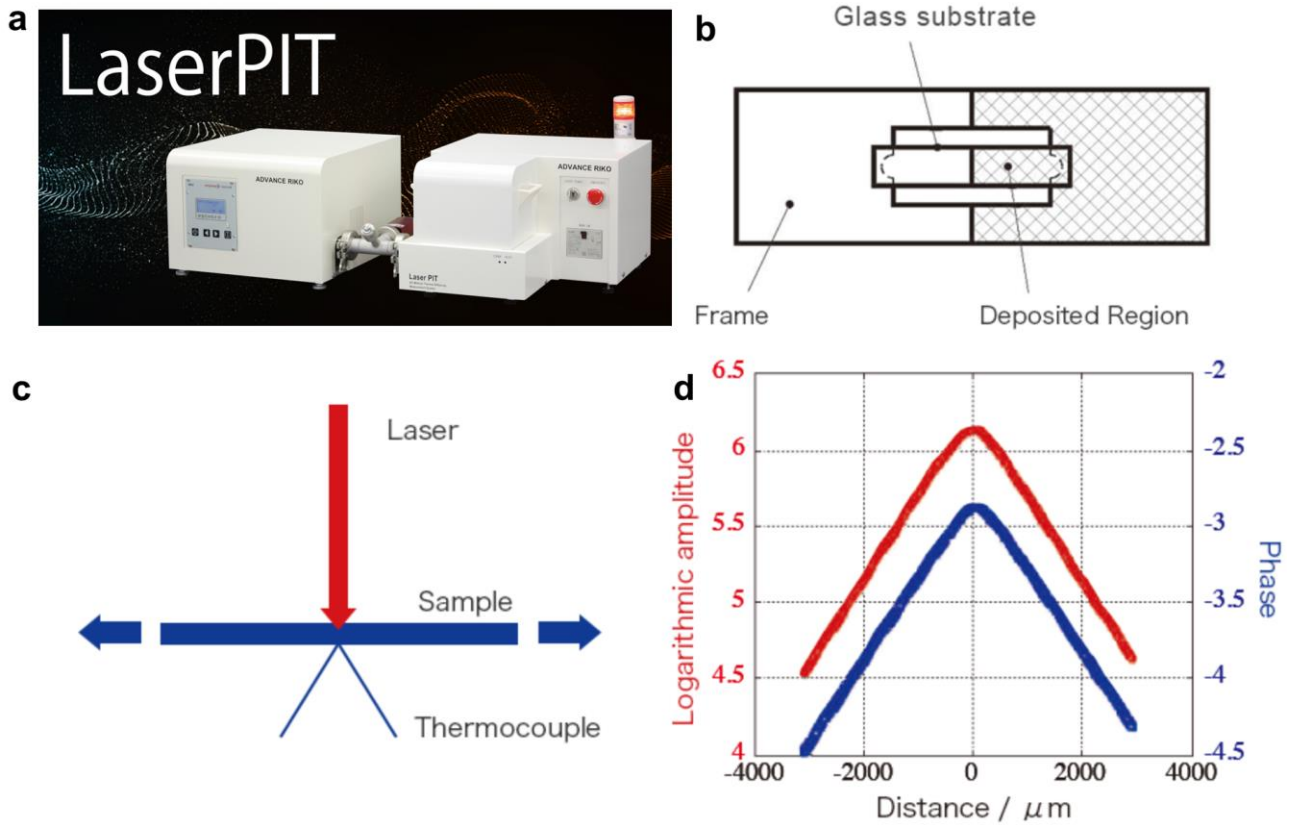

**Supplementary Fig. 35** The measurement method (differential method) of thin film thermal conductivity. **(a)** Overview of Laser-PIT. **(b)** Schematic diagram of the thin film to be tested placed on the sample stage. **(c-d)** Testing principle. LaserPIT employs a glass substrate to measure the thermal conductivity of thin films. The method involves depositing the film on only half of one side of the glass substrate and measuring the coated and uncoated regions of the glass substrate. The thermal conductivity of the thin film is evaluated based on the measurement results from both regions, the thickness and volumetric specific heat capacity of the glass substrate, and the thickness and volumetric specific heat capacity of the thin film.

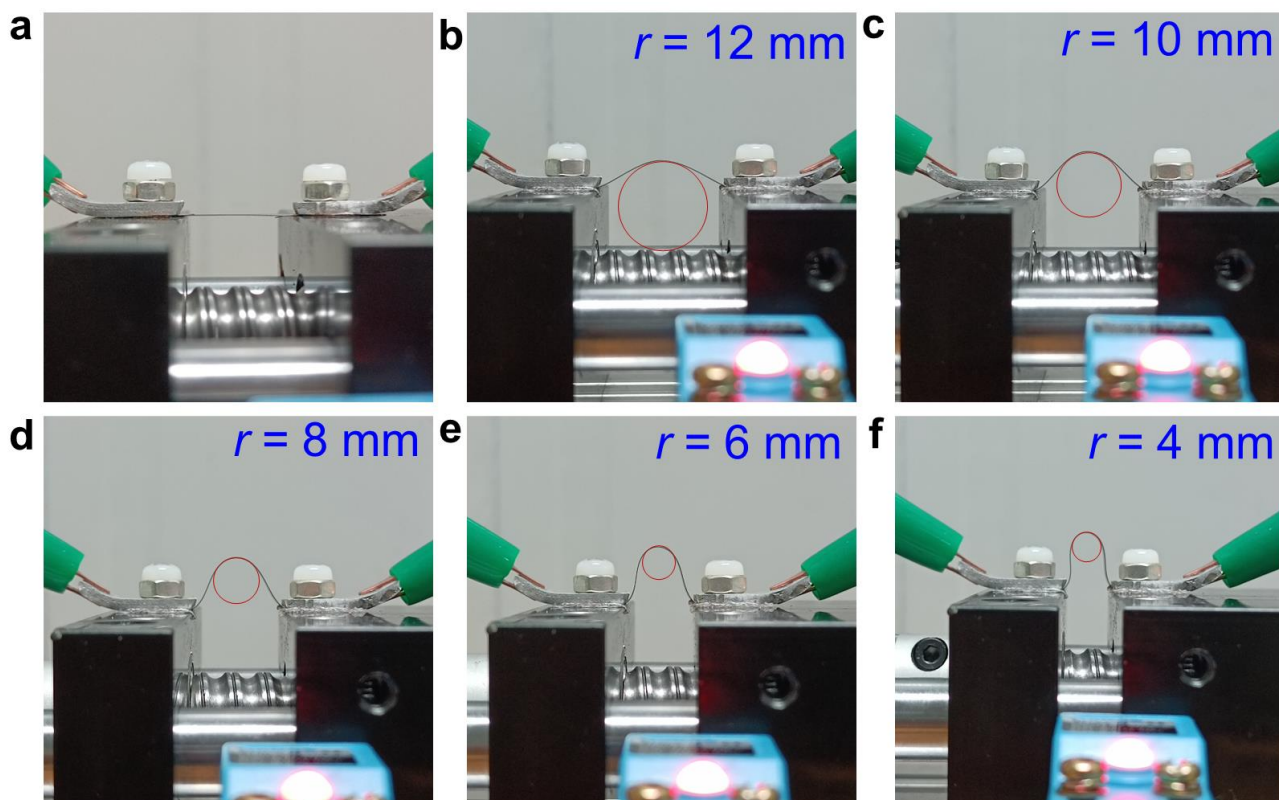

**Supplementary Fig. 36** Photos that show the bending test. Photographs of flexible p-type  $\text{Ce}_{1.25}\text{Fe}_3\text{CoSb}_{12}$  thin film during bending as a function of  $r$  for (a) not bending, (b)  $r = 12$  mm, (c)  $r = 10$  mm, (d)  $r = 8$  mm, (e)  $r = 6$  mm, and (f)  $r = 4$  mm.

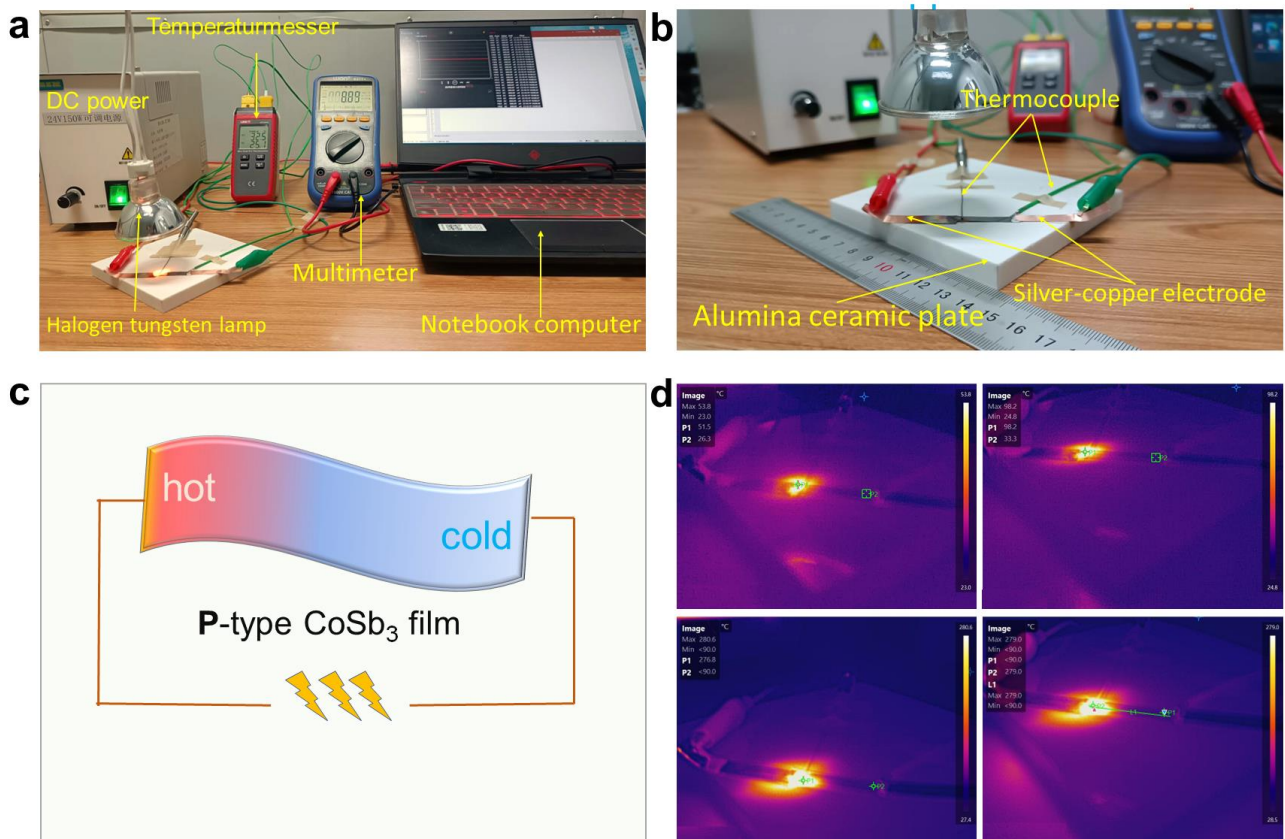

**Supplementary Fig. 37** A photothermal-electric detection platform for thermoelectric thin film. **(a)** Photograph of light-induced thermal-electric signal detection platform. **(b)** Photograph of main components of the platform. **(c)** Principle of temperature detection of flexible thin films. **(d)** Infrared photos of temperature distribution of flexible film during light-induced thermal-electric detection at different temperatures.



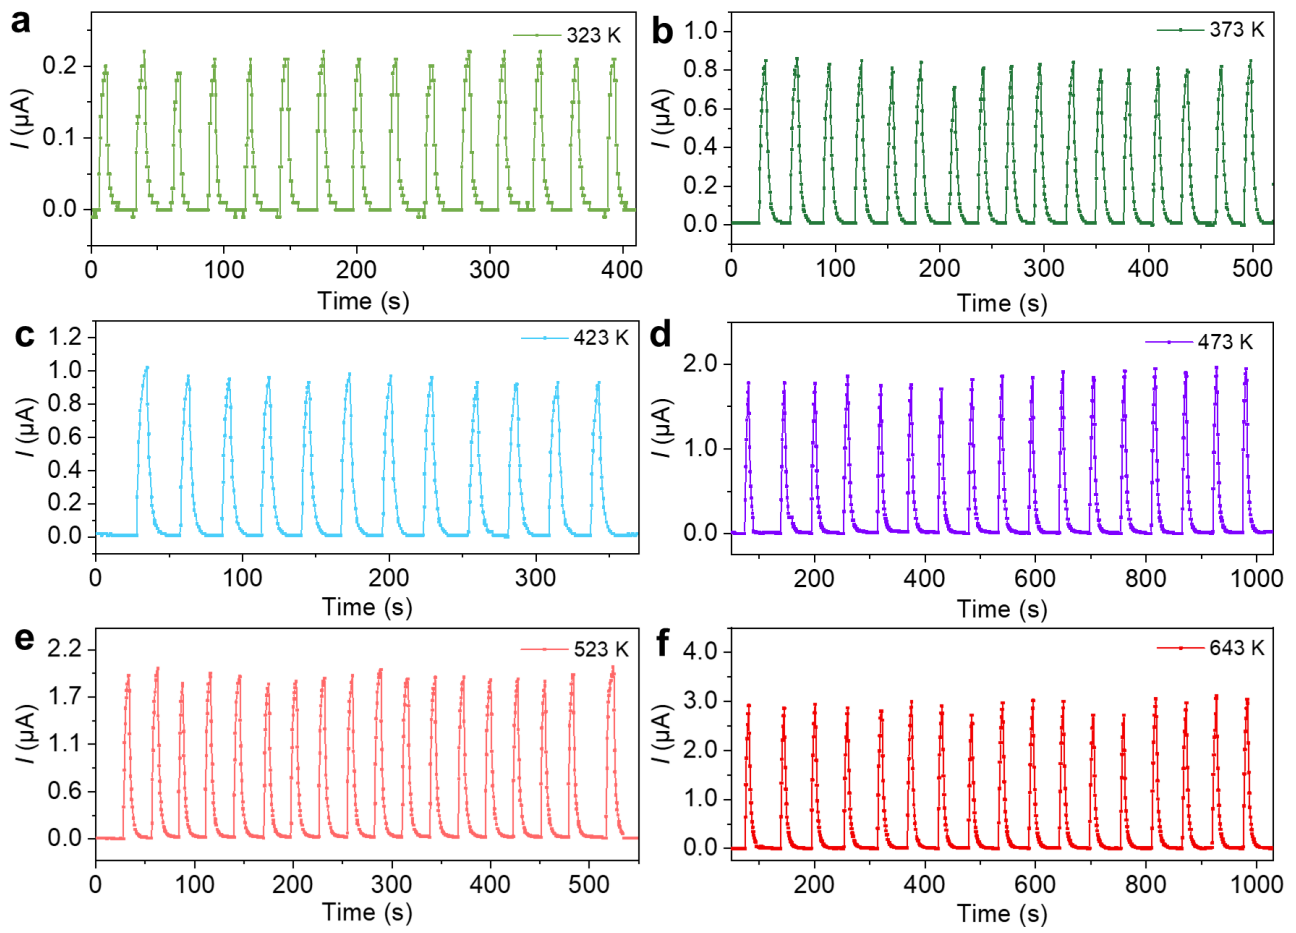

**Supplementary Fig. 38** Measured current  $I$  varies over time when low-frequency light pulse modulation is applied at various light temperatures. (a) 323 K, (b) 373 K, (c) 423 K, (d) 473 K, (e) 523 K, and (f) 643 K.

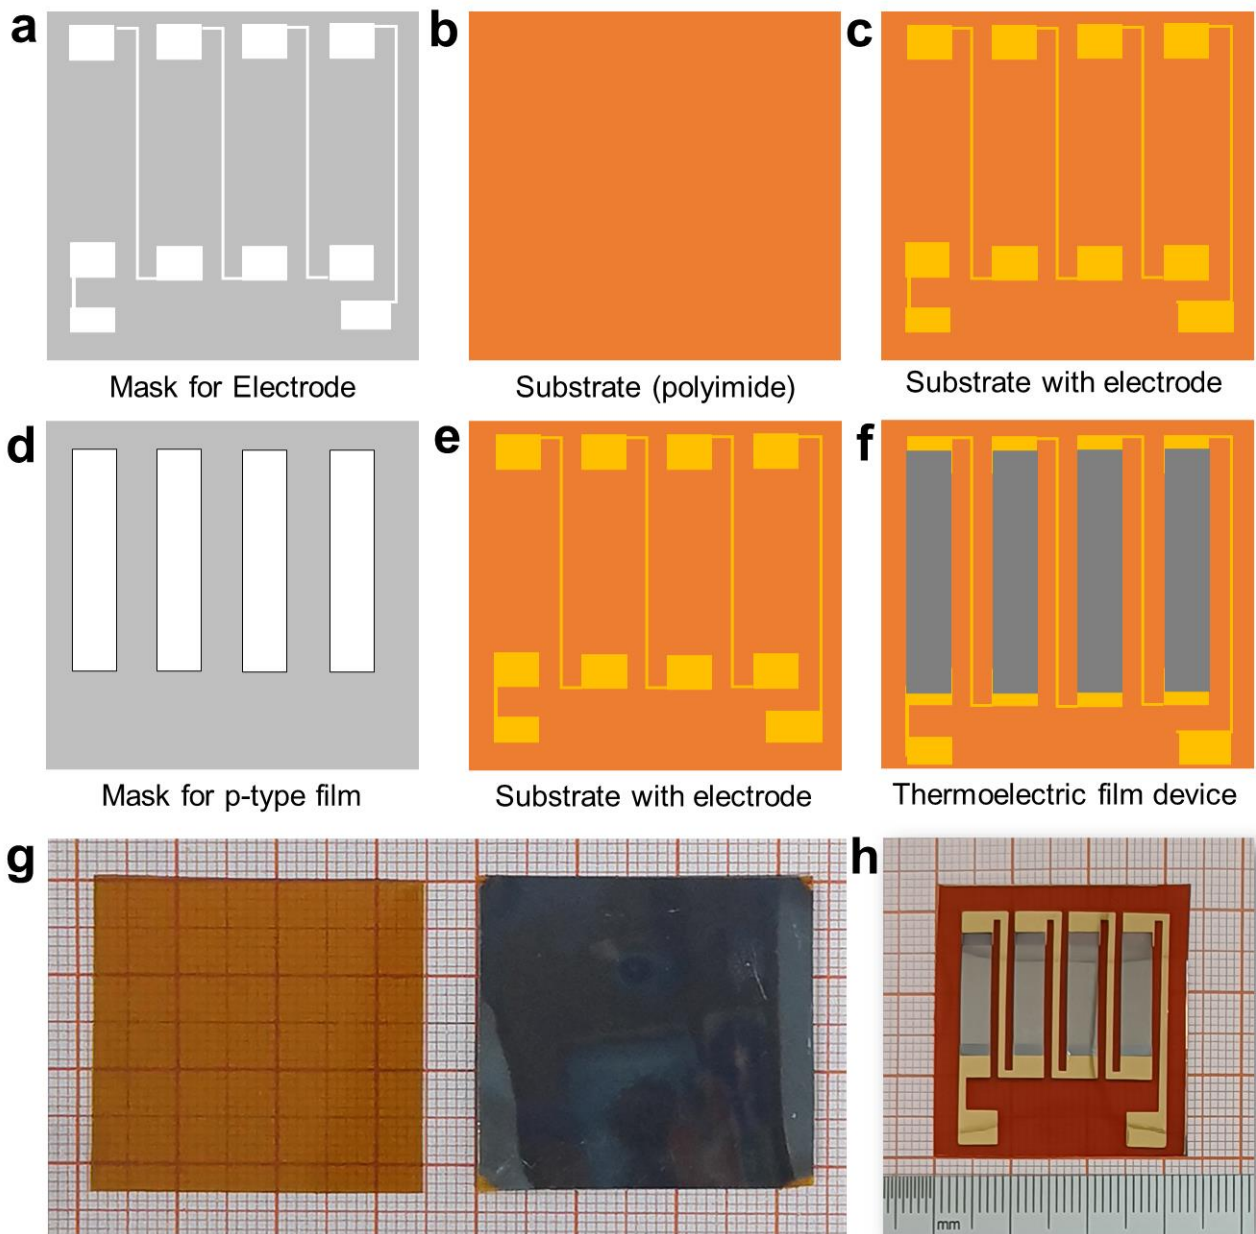

**Supplementary Fig. 39** The main steps in the preparation process of flexible  $\text{Ce}_{1.25}\text{Fe}_3\text{CoSb}_{12}$  thin-film-based thermoelectric devices. **(a)** Schematic diagram of electrode mask plate. **(b)** Schematic diagram of the flexible PI substrate. **(c)** Schematic diagram of gold electrode deposition on the substrate. **(d)** Schematic diagram of mask plate for thin films. **(e)** Substrate with gold electrodes for thin film deposition. **(f)** Schematic diagram of the complete device. **(g)** Comparison between blank substrate and substrate after thin film deposition. **(h)** Photograph of as-fabricated flexible thin-film-based device.

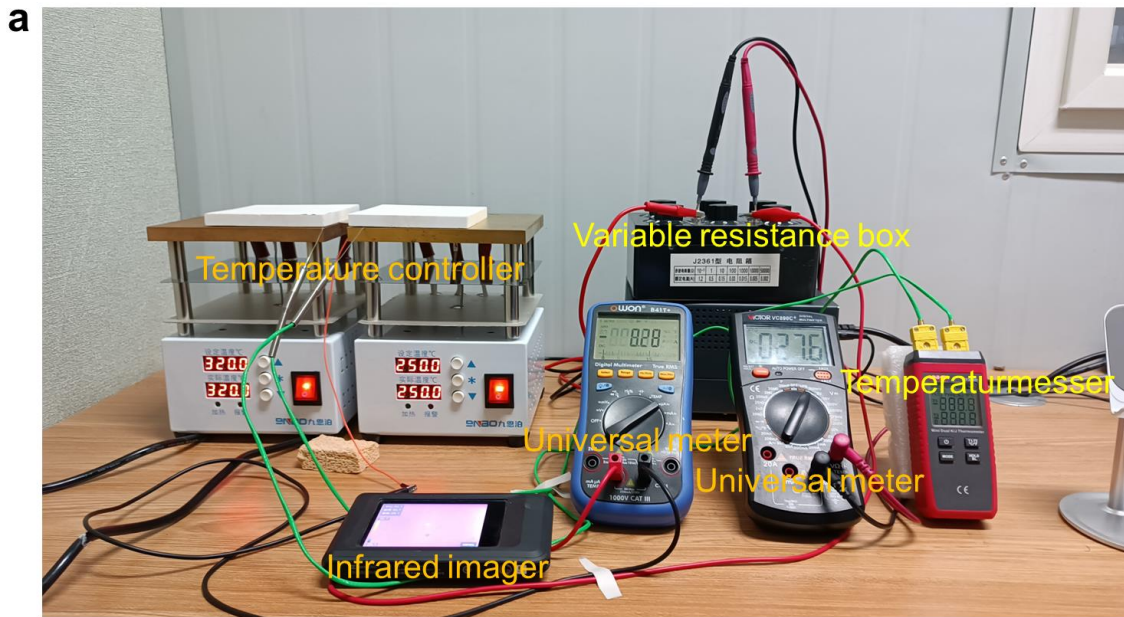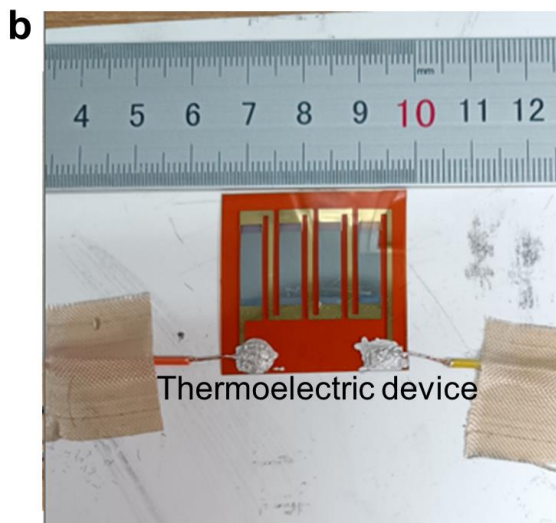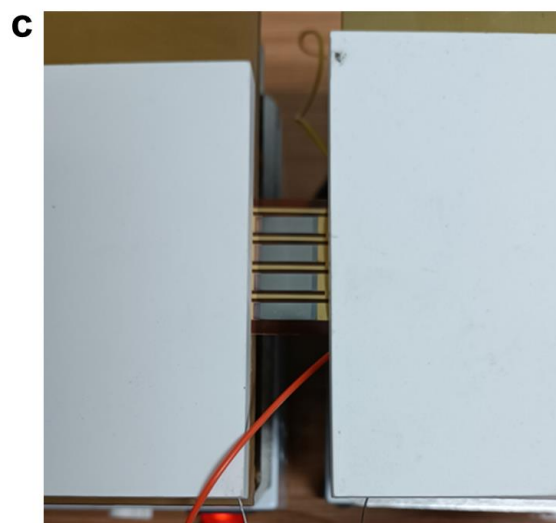

**Supplementary Fig. 40** Photos of test platform for thin-film-based thermoelectric device. **(a)** Performance testing platform for flexible thin-film-based thermoelectric device. **(b)** External circuit connection for the device. **(c)** The setting of hot and cold sides during the device testing process.

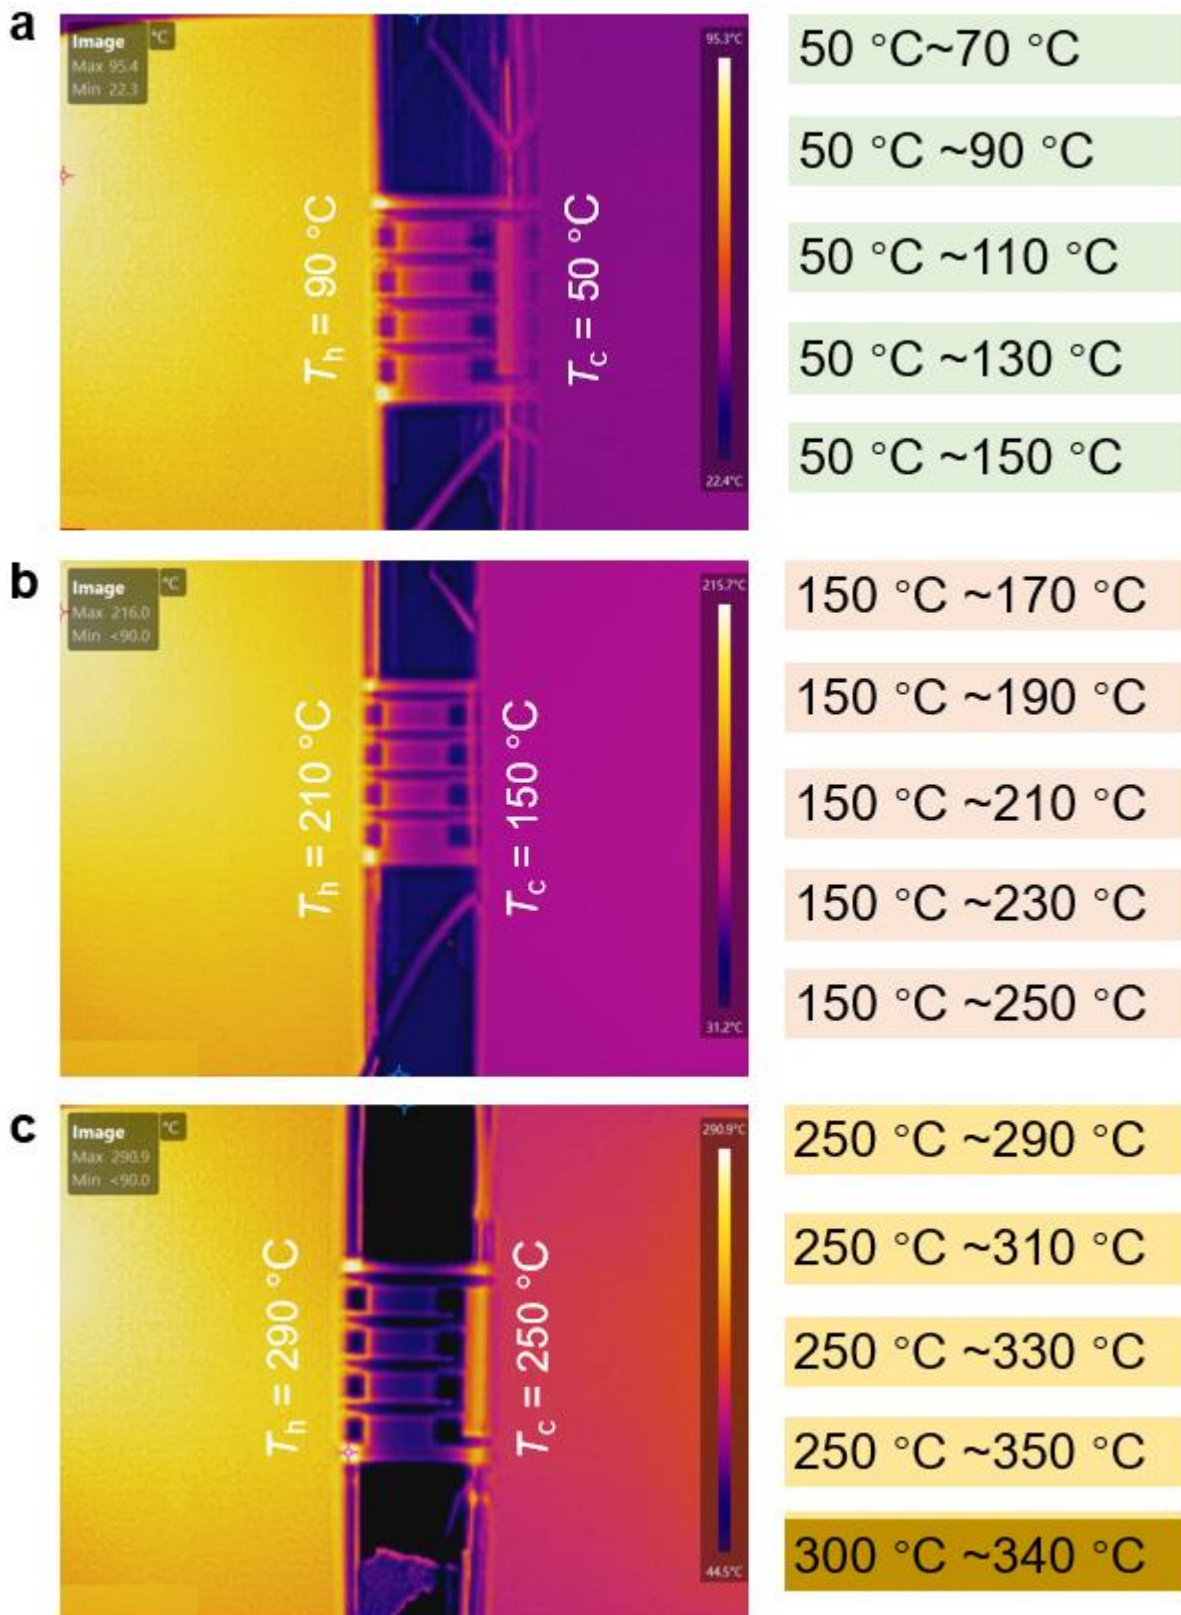

**Supplementary Fig. 41** The infrared photos of the temperature distributions at the hot and cold sides of flexible thin-film-based devices during the performance testing process, along with their

corresponding temperature differentials as follows. **(a)** cold side kept at 50 °C, **(b)** cold side kept at 150 °C, and **(c)** cold side kept at 250 °C.

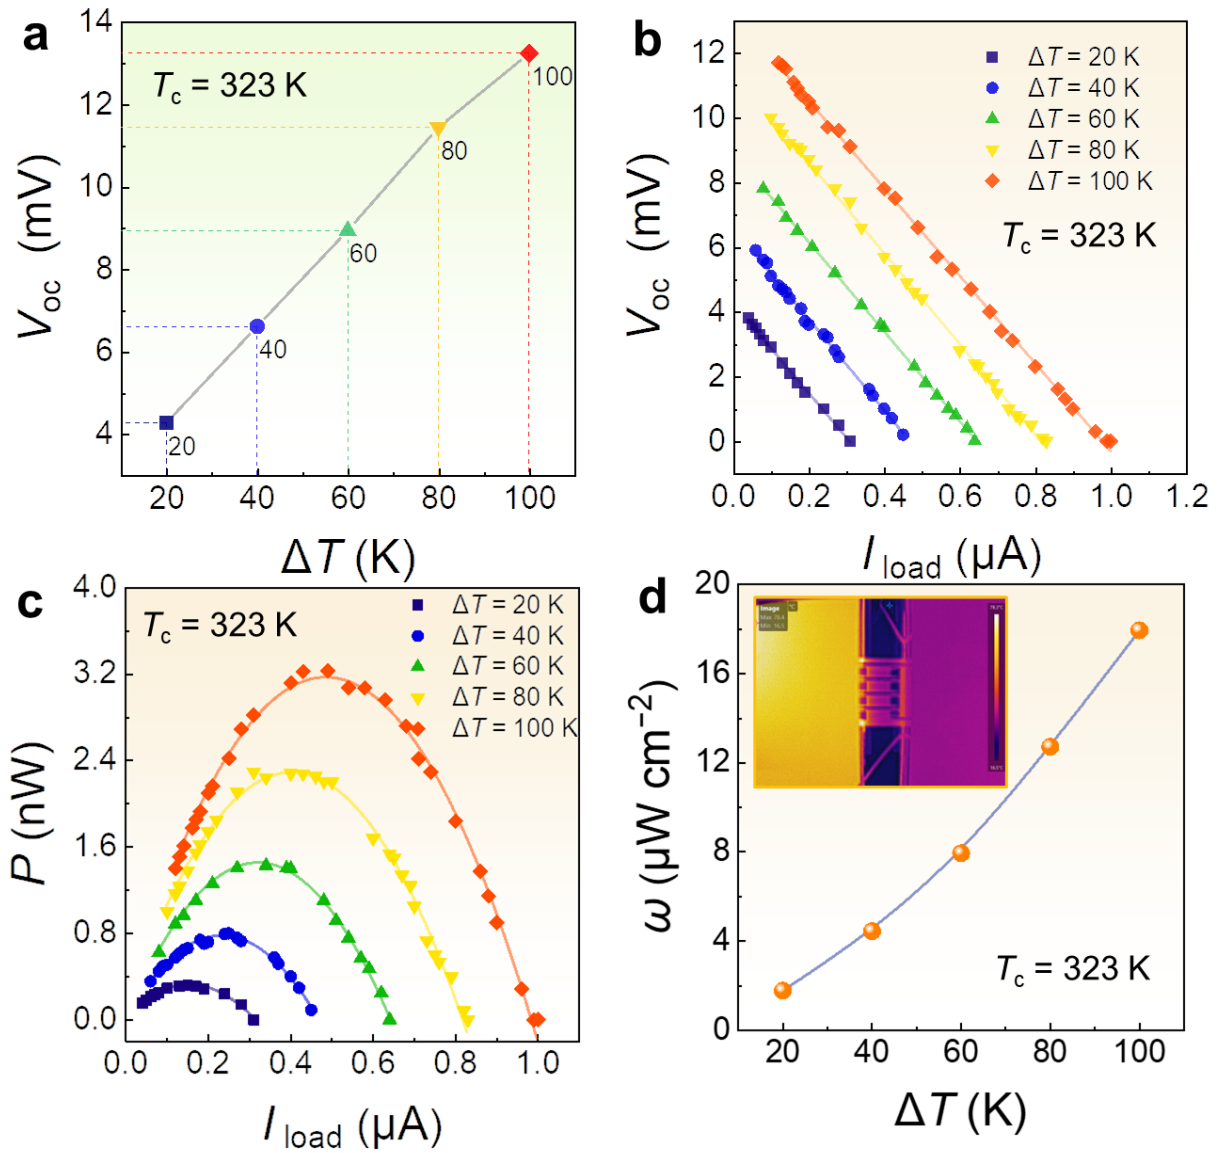

**Supplementary Fig. 42** Output performance of film thermoelectric device when cold-side temperature  $T_c$  is 323 K. **(a)** Measured open-circuit voltages  $V_{oc}$  as a function of temperature difference  $\Delta T$  for  $Ce_{1.25}Fe_3CoSb_{12}$  flexible thin-film-based device. The cold-side temperature  $T_c$  is 323 K. The measured **(b)**  $V_{oc}$  and **(c)** output power  $P$  as a function of loading current  $I_{load}$  at different  $\Delta T$ s. **(d)** Measured output power density  $\omega$  as a function of  $\Delta T$ . The inset shows the device during measurement.

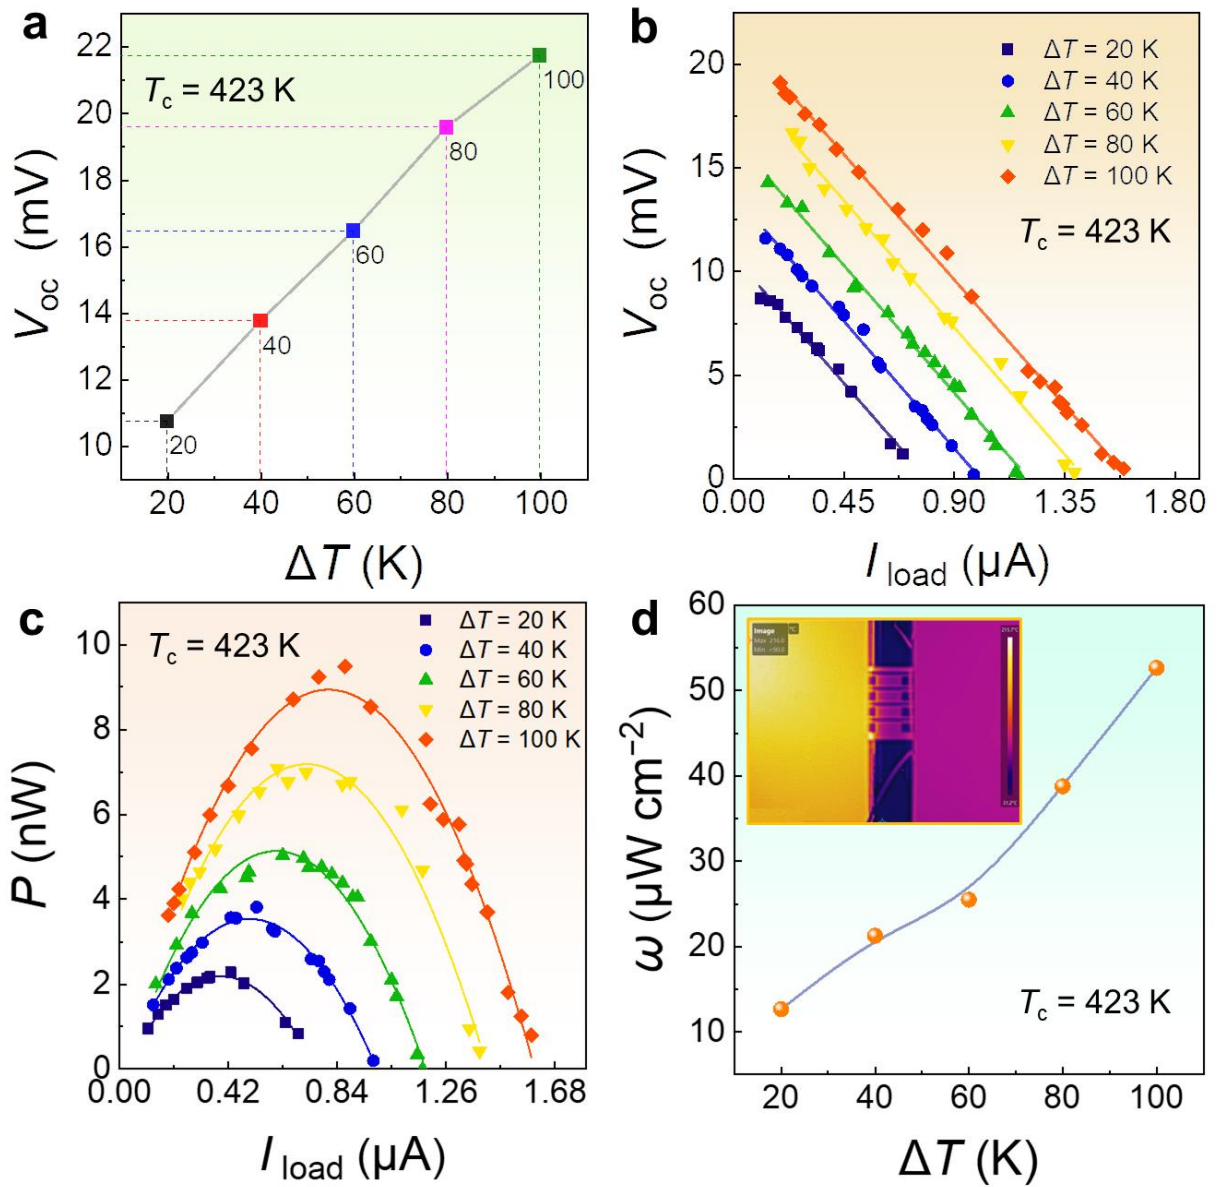

**Supplementary Fig. 43** Output performance of film thermoelectric device when  $T_c$  is 423 K. (a) Measured  $V_{oc}$  as a function of  $\Delta T$  for  $Ce_{1.25}Fe_3CoSb_{12}$  flexible thin-film-based device. The  $T_c$  is 423 K. The measured (b)  $V_{oc}$  and (c)  $P$  as a function of  $I_{load}$  at different  $\Delta T$ s. (d) Measured  $\omega$  as a function of  $\Delta T$ . The inset shows the device during measurement.

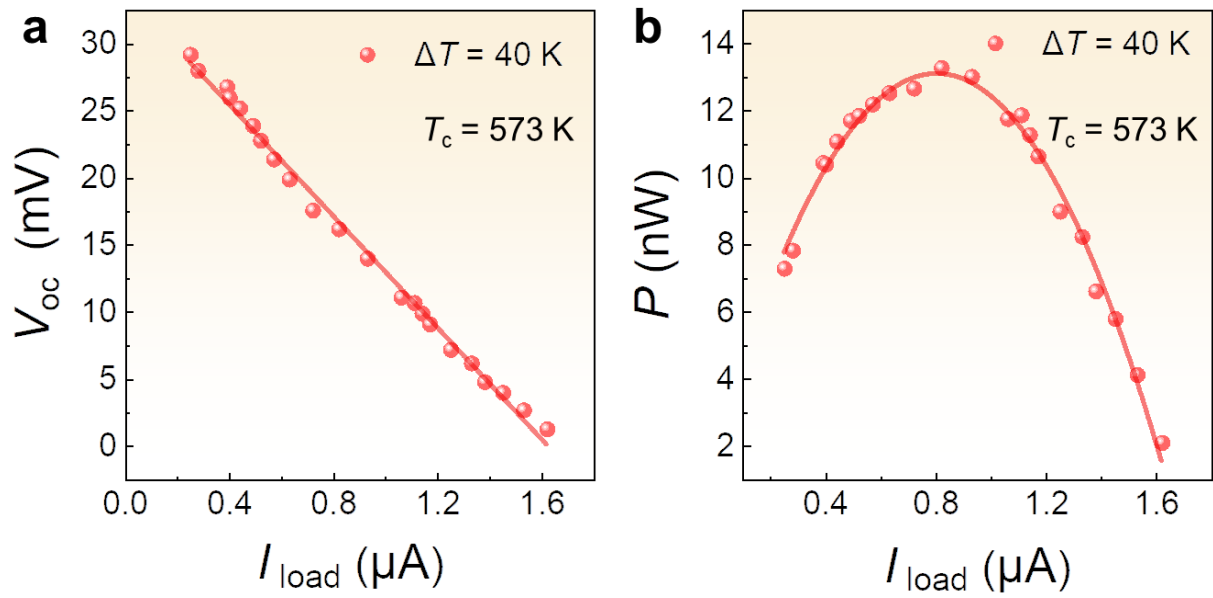

**Supplementary Fig. 44.** Output performance of film thermoelectric device when  $T_c$  is 523 K. The measured (a)  $V_{oc}$  and (b)  $P$  as a function of  $I_{load}$  at different  $\Delta T$ s.



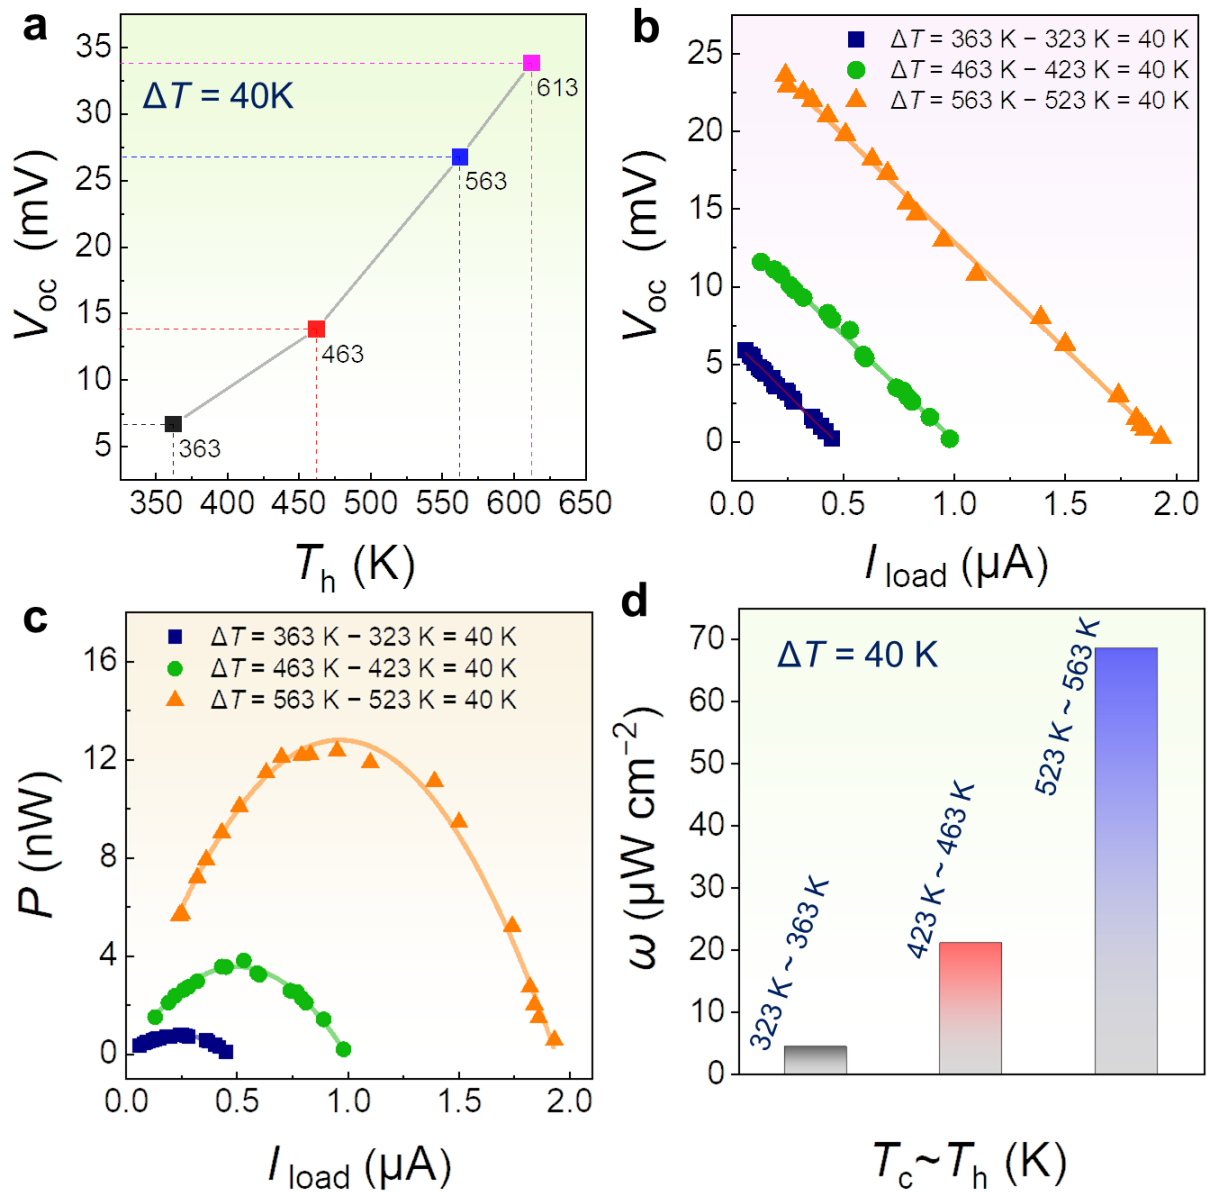

**Supplementary Fig. 45** Output performance of film thermoelectric device at different cold-side and hot-side temperature. **(a)** Measured  $V_{oc}$  as a function of hot-side temperature  $T_h$  with same  $\Delta T$ s of 40 K for  $\text{Ce}_{1.25}\text{Fe}_3\text{CoSb}_{12}$  flexible thin-film-based device. The measured **(b)**  $V_{oc}$  and **(c)**  $P$  as a function of  $I_{load}$  at different  $T_h$  values with the same  $\Delta T$ s of 40 K. **(d)** Measured  $\omega$  as a function of  $T_h$  with the same  $\Delta T$ s of 40 K.

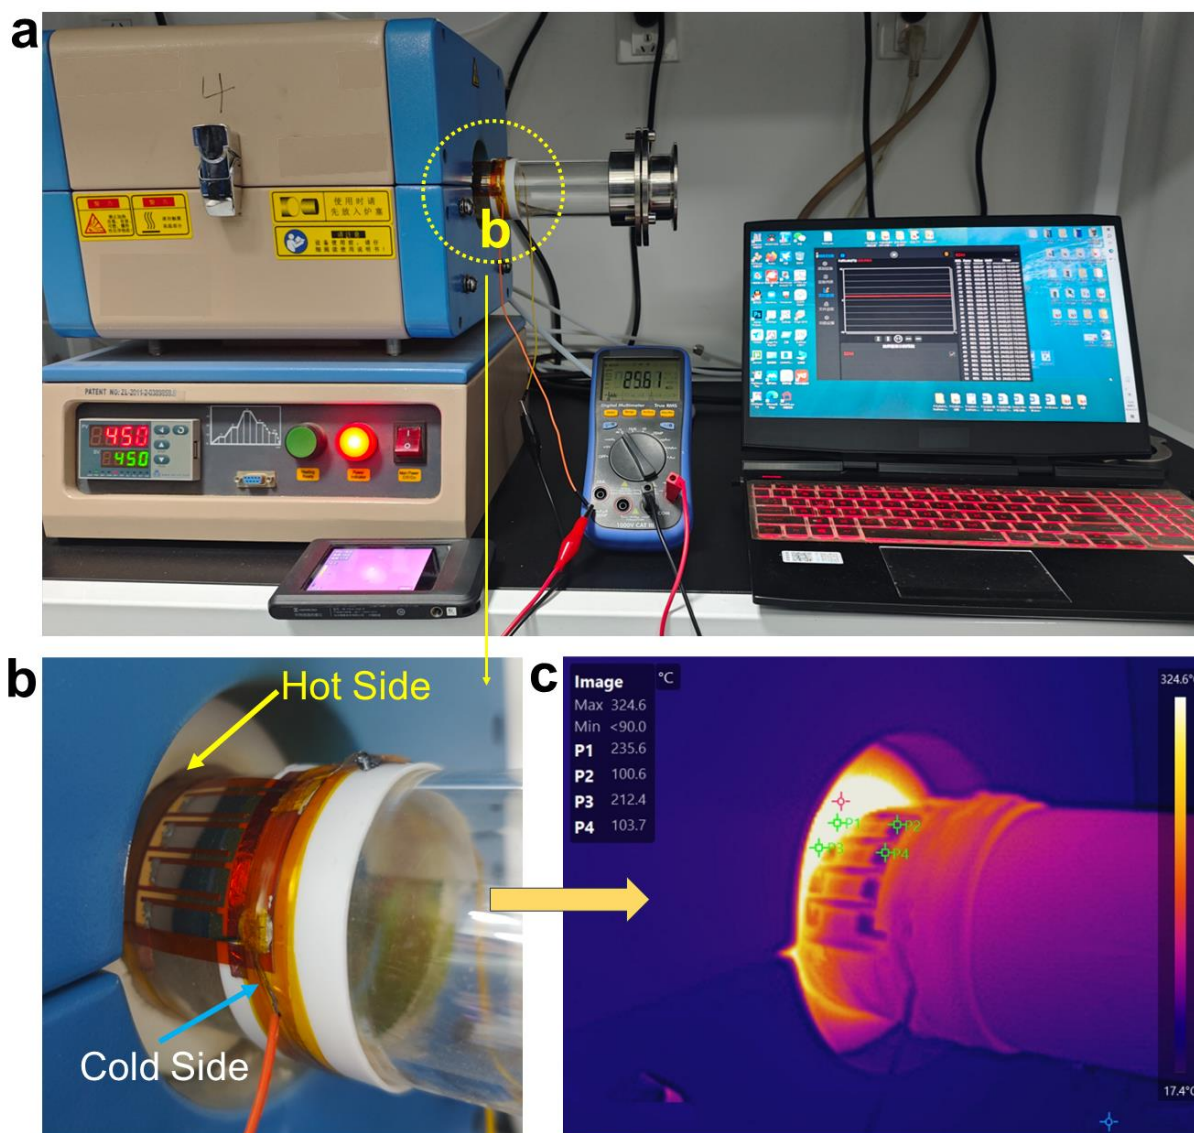

**Supplementary Fig. 46** Photos that illustrate the high-temperature application of the as-fabricated device. **(a)** The  $\text{Ce}_{1.25}\text{Fe}_3\text{CoSb}_{12}$  flexible thin-film-based device gathers residual heat from the curved surface of the tube furnace for power generation. **(b)** Image showing the device snugly affixed to the surface of a heating tube furnace. **(c)** Infrared image displaying the surface temperature distribution of the flexible thin-film-based device during waste heat power generation.

**Supplementary Table 1.** A summary of thermoelectric performance of p-type CoSb<sub>3</sub>-based skutterudite thermoelectric thin films. Here  $T$  represents the absolute temperature,  $\sigma$  represents the electrical conductivity,  $S$  represents the Seebeck coefficient,  $S^2\sigma$  represents the power factor, and  $\kappa$  represents the thermal conductivity. ITO is abbreviated from indium tin oxide.

| Inorganic                                                                  | Substrate                      | Type     | $ZT$        | $T$ (K)    | $\sigma$ (S cm <sup>-1</sup> ) | $S$ ( $\mu$ V K <sup>-1</sup> ) | $S^2\sigma$ ( $\mu$ W cm <sup>-1</sup> K <sup>-2</sup> ) | $\kappa$ (W m <sup>-1</sup> K <sup>-1</sup> ) | Flexible   | Ref.             |
|----------------------------------------------------------------------------|--------------------------------|----------|-------------|------------|--------------------------------|---------------------------------|----------------------------------------------------------|-----------------------------------------------|------------|------------------|
| <b>Ce<sub>1.25</sub>CoFe<sub>3</sub>Sb<sub>12</sub></b>                    | <b>Polyimide</b>               | <b>p</b> | <b>0.58</b> | <b>653</b> | <b>105.1</b>                   | <b>98.1</b>                     | <b>1.01</b>                                              | <b>0.11</b>                                   | <b>Yes</b> | <b>This work</b> |
| <b>CoSb<sub>3</sub></b>                                                    | <b>Polyimide</b>               | <b>p</b> | —           | 453        | 339.0                          | 66                              | ~1.5                                                     | —                                             | Yes        | 17               |
| <b>Fe-doped CoSb<sub>3</sub></b>                                           | Silicon                        | p        | —           | 420        | 108.6                          | 254.0                           | ~7.0                                                     | —                                             | No         | 18               |
| <b>Ti-doped CoSb<sub>3</sub></b>                                           | BK7 glass                      | p        | 0.86        | 523        | 149.0                          | 255.0                           | ~9.70                                                    | 0.62                                          | No         | 19               |
| <b>CoSb<sub>3</sub></b>                                                    | ITO                            | p        | —           | 300        | 2100                           | 58                              | ~7.1                                                     | —                                             | No         | 20               |
| <b>CoSb<sub>3</sub></b>                                                    | Quartz                         | p        | —           | 400        | 1818                           | 26                              | ~1.2                                                     | —                                             | No         | 21               |
| <b>FeSb<sub>3</sub></b>                                                    | SiO <sub>2</sub> /Si           | p        | —           | 500        | 1400                           | 100                             | ~14                                                      | —                                             | No         | 22               |
| <b>CoSb<sub>3</sub></b>                                                    | Glass                          | p        | —           | 713        | 77.4                           | 154.5                           | ~1.8                                                     | —                                             | No         | 23               |
| <b>Sm<sub>0.3</sub>(Fe<sub>0.63</sub>Ni<sub>0.37</sub>)Sb<sub>12</sub></b> | Silica                         | p        | —           | 523        | 615                            | 78                              | ~3.7                                                     | —                                             | No         | 24               |
| <b>LaFe<sub>3</sub>CoSb<sub>12</sub></b>                                   | SiO <sub>2</sub> /Si           | p        | —           | 400        | 769                            | 68                              | ~3.6                                                     | —                                             | No         | 25               |
| <b>Ce<sub>0.1</sub>Fe<sub>0.7</sub>Ni<sub>3.29</sub>Sb<sub>12</sub></b>    | quartz glass                   | p        | —           | 470        | 158.7                          | 139.2                           | ~3.1                                                     | —                                             | No         | 26               |
| <b>IrSb<sub>3</sub></b>                                                    | silicon                        | p        | —           | 298        | —                              | 303                             | —                                                        | —                                             | No         | 27               |
| <b>Ce<sub>0.9</sub>CoFe<sub>3</sub>Sb<sub>12</sub></b>                     | Al <sub>2</sub> O <sub>3</sub> | p        | —           | 330        | —                              | 9.8                             | —                                                        | —                                             | No         | 28               |

**Supplementary Table 2.** Detailed information of flexible polyimide substrate.

| No. | Test content name           |                   | Unit | Tolerance range       | Test result          |
|-----|-----------------------------|-------------------|------|-----------------------|----------------------|
| 1   | Thickness                   |                   | μm   | 125                   | 125                  |
| 2   | Thickness tolerance range   |                   | μm   | ±5                    | —                    |
| 3   | Tensile strength            | MD                | MPa  | ≥135                  | 139                  |
|     |                             | TD                | MPa  | ≤115                  | 118                  |
| 4   | Elongation                  | MD                | %    | ≥35                   | 55                   |
|     |                             | TD                | %    |                       | 70                   |
| 5   | Insulation strength         | average           | MV/m | ≥135                  | 135                  |
|     |                             | individual        | MV/m | ≥100                  | 110                  |
| 6   | Surface resistivity (200°C) |                   | Ω    | ≥1.0*10 <sup>13</sup> | 1.1*10 <sup>13</sup> |
| 7   | Shrinkage (200°C ± 5)       | MD                | ‰    | ≤1.0                  | 0.3                  |
|     |                             | TD                |      | ≤0.9                  | 0.12                 |
| 8   | Breakdown voltage           | thickness (125μm) | KV   | ≥5                    | 5                    |
| 9   | Temperature resistance      | thickness (125μm) | °C   | 350                   | 350                  |
| 10  | Volume resistivity (200°C)  |                   | Ω m  | ≥1.0*10 <sup>13</sup> | 1.0*10 <sup>13</sup> |

Polyimide (PI) film test report. (Shenzhen Runsea Electronic Co.,)

**Supplementary Table 3.** A summary of the flexibility of flexible thermoelectric thin films. Here  $R/R_0$  represents the normalized resistance and  $r$  represents the bending radius. CF is abbreviated from cellulose fiber.

| Circles | $R/R_0$ | Component                                             | $r$ (mm) | Ref.      |
|---------|---------|-------------------------------------------------------|----------|-----------|
| 1500    | 1.25    | Ag <sub>2</sub> Se                                    | 4        | 29        |
| 1000    | 1.11    | CuAgSe                                                | 4        | 30        |
| 300     | 1.11    | Bi <sub>2</sub> Te <sub>3</sub> nanosheets            | 4        | 31        |
| 1000    | 1.10    | Bi <sub>2</sub> Te <sub>3</sub>                       | 4        | 32        |
| 100     | 1.04    | Bi <sub>2</sub> Te <sub>3</sub>                       | 10       | 33        |
| 2000    | 1.07    | Sb <sub>2</sub> Te <sub>3</sub> /Te                   | 6.5      | 34        |
| 2000    | 1.05    | Bi <sub>2</sub> Te <sub>3</sub>                       | 8        | 35        |
| 1000    | 1.14    | Ag <sub>2</sub> Se                                    | /        | 36        |
| 1000    | 1.6     | CoSb <sub>3-x</sub> Te <sub>x</sub>                   | 4        | 37        |
| 1000    | 1.06    | SnSe                                                  | 4.5      | 38        |
| 1000    | 1.2     | AgBi <sub>0.5</sub> Sb <sub>1.5</sub> Te <sub>3</sub> | 5        | 39        |
| 1000    | 1.025   | Bi <sub>0.4</sub> Sb <sub>1.6</sub> Te <sub>3</sub>   | 10       | 40        |
| 1000    | 1.2     | Bi <sub>0.5</sub> Sb <sub>1.5</sub> Te <sub>3</sub>   | 5        | 41        |
| 2000    | 1.3     | Bi <sub>2</sub> Te <sub>3</sub>                       | 7        | 42        |
| 100     | 1.06    | Bi <sub>2</sub> Te <sub>3</sub> -CF                   | 10       | 43        |
| 600     | 1.04    | Bi <sub>2</sub> Te <sub>3</sub> -CF                   | 4        | 44        |
| 2000    | 1.06    | Ce <sub>1.25</sub> Fe <sub>3</sub> CoSb <sub>12</sub> | 4        | This work |
| 1500    | 1.05    | Ce <sub>1.25</sub> Fe <sub>3</sub> CoSb <sub>12</sub> | 4        | This work |
| 1000    | 1.03    | Ce <sub>1.25</sub> Fe <sub>3</sub> CoSb <sub>12</sub> | 4        | This work |

**Supplementary Table 4.** EDS results for Ce<sub>1.25</sub>Fe<sub>3</sub>CoSb<sub>12</sub> film taken from Fig. 3a.

| <b>Region</b> | <b>Ce (at%)</b> | <b>Co (at%)</b> | <b>Fe (at%)</b> | <b>Sb (at%)</b> |
|---------------|-----------------|-----------------|-----------------|-----------------|
| <b>1</b>      | 0.99            | 12.25           | 6.11            | 80.65           |
| <b>2</b>      | 1.98            | 13.43           | 7.57            | 77.02           |
| <b>3</b>      | 1.53            | 12.58           | 8.1             | 77.79           |
| <b>4</b>      | 1.76            | 10.64           | 10.45           | 77.15           |
| <b>5</b>      | 1.86            | 15.27           | 5.84            | 77.03           |
| <b>6</b>      | 1.03            | 11.64           | 7.74            | 79.86           |
| <b>7</b>      | 1.16            | 10.77           | 9.57            | 78.5            |
| <b>8</b>      | 1.15            | 10.03           | 5.77            | 83.05           |
| <b>9</b>      | 1.87            | 14.37           | 6.94            | 76.82           |
| <b>10</b>     | 1.41            | 10.59           | 10.84           | 77.16           |
| <b>11</b>     | 1.29            | 8.11            | 5.24            | 85.36           |
| <b>12</b>     | 0.98            | 10.54           | 6.71            | 81.76           |
| <b>13</b>     | 1.44            | 6.81            | 5.64            | 86.1            |
| <b>14</b>     | 0.88            | 9.64            | 6.36            | 83.11           |

**Supplementary Table 5.** Comparison of nominal compositions and actual compositions for different thin films.

|   | <b>Composition</b>                            | <b>Ce(at%)</b> | <b>Co(at%)</b> | <b>Fe(at%)</b> | <b>Sb(at%)</b> |
|---|-----------------------------------------------|----------------|----------------|----------------|----------------|
| 1 | $\text{Ce}_{0.25}\text{CoFe}_3\text{Sb}_{12}$ | 1.54%          | 6.15%          | 18.46%         | 73.85%         |
|   | Actual component-1                            | 0.10%          | 11.90%         | 7.50%          | 80.50%         |
| 2 | $\text{Ce}_{0.50}\text{CoFe}_3\text{Sb}_{12}$ | 3.03%          | 6.06%          | 18.18%         | 72.73%         |
|   | Actual component-2                            | 0.20%          | 21.90%         | 9.10%          | 70.10%         |
| 3 | $\text{Ce}_{0.75}\text{CoFe}_3\text{Sb}_{12}$ | 4.48%          | 5.97%          | 17.91%         | 71.64%         |
|   | Actual component-3                            | 0.20%          | 21.90%         | 12.00%         | 66.00%         |
| 4 | $\text{Ce}_{1.25}\text{CoFe}_3\text{Sb}_{12}$ | 7.25%          | 5.80%          | 17.39%         | 69.57%         |
|   | Actual component-4                            | 0.30%          | 21.20%         | 8.70%          | 69.70%         |
| 5 | $\text{Ce}_{1.50}\text{CoFe}_3\text{Sb}_{12}$ | 8.57%          | 5.71%          | 17.14%         | 68.57%         |
|   | Actual component-5                            | 0.20%          | 22.70%         | 11.20%         | 65.90%         |

## References

1. Kresse, G. & Hafner, J. *Ab initio* molecular-dynamics simulation of the liquid-metal-amorphous-semiconductor transition in germanium. *Phys. Rev. B* **49**, 14251-14269 (1994).
2. Kresse, G. & Hafner, J. *Ab initio* molecular dynamics for liquid metals. *Phys. Rev. B* **47**, 558-561 (1993).
3. Kresse, G. & Furthmüller, J. Efficiency of *ab-initio* total energy calculations for metals and semiconductors using a plane-wave basis set. *Comp. Mater. Sci.* **6**, 15-50 (1996).
4. Kresse, G. & Hafner, J. Norm-conserving and ultrasoft pseudopotentials for first-row and transition elements. *J. Phys. Condens. Mat.* **6**, 8245-8257 (1994).
5. Kresse, G. & Furthmüller, J. Efficient iterative schemes for *ab initio* total-energy calculations using a plane-wave basis set. *Phys. Rev. B* **54**, 11169-11186 (1996).
6. Kresse, G. & Joubert, D. From ultrasoft pseudopotentials to the projector augmented-wave method. *Phys. Rev. B* **59**, 1758-1775 (1999).
7. Perdew, J.P., Burke, K. & Ernzerhof, M. Generalized gradient approximation made simple. *Phys. Rev. Lett.* **77**, 3865-3868 (1996).
8. Setyawan, W. & Curtarolo, S. High-throughput electronic band structure calculations: challenges and tools. *Comp. Mater. Sci.* **49**, 299-312 (2010).
9. Shi, X.L. et al. Boosting the thermoelectric performance of p-type heavily Cu-doped polycrystalline SnSe *via* inducing intensive crystal imperfections and defect phonon scattering. *Chem. Sci.* **9**, 7376-7389 (2018).
10. Shi, X. et al. High thermoelectric performance in p-type polycrystalline Cd-doped SnSe achieved by a combination of cation vacancies and localized lattice engineering. *Adv. Energy Mater.* **9**, 1803242 (2019).
11. Shi, X. et al. Polycrystalline SnSe with extraordinary thermoelectric property *via* nanoporous design. *ACS Nano* **12**, 11417-11425 (2018).



12. Jin, M. et al. Super large  $\text{Sn}_{1-x}\text{Se}$  single crystals with excellent thermoelectric performance. *ACS Appl. Mater. Interfaces* **11**, 8051-8059 (2019).
13. Caillat, T., Kulleck, J., Borshchevsky, A. & Fleurial, J.P. Preparation and thermoelectric properties of the skutterudite-related phase  $\text{Ru}_{0.5}\text{Pd}_{0.5}\text{Sb}_3$ . *J. Appl. Phys.* **79**, 8419-8426 (1996).
14. Caillat, T., Borshchevsky, A. & Fleurial, J.P. Properties of single crystalline semiconducting  $\text{CoSb}_3$ . *J. Appl. Phys.* **80**, 4442-4449 (1996).
15. Sales, B.C., Mandrus, D., Chakoumakos, B.C., Keppens, V. & Thompson, J.R. Filled skutterudite antimonides: Electron crystals and phonon glasses. *Phys. Rev. B* **56**, 15081-15089 (1997).
16. Wang, H., Li, S., Li, X. & Zhong, H. Microstructure and thermoelectric properties of doped p-type  $\text{CoSb}_3$  under TGZM effect. *J. Cryst. Growth* **466**, 56-63 (2017).
17. Zheng, Z.-h. et al. Thermoelectric properties and micro-structure characteristics of nano-sized  $\text{CoSb}_3$  thin films prefabricating by co-sputtering. *J. Alloys Compd.* **732**, 958-962 (2018).
18. Masarrat, A. et al. Effect of Fe ion implantation on the thermoelectric properties and electronic structures of  $\text{CoSb}_3$  thin films. *RSC Adv.* **9**, 36113-36122 (2019).
19. Liang, G.-x. et al. Nano structure Ti-doped skutterudite  $\text{CoSb}_3$  thin films through layer inter-diffusion for enhanced thermoelectric properties. *J. Eur. Ceram. Soc.* **39**, 4842-4849 (2019).
20. Yadav, S., Yadav, B.S., Chaudhary, S. & Pandya, D.K. Deposition potential controlled structural and thermoelectric behavior of electrodeposited  $\text{CoSb}_3$  thin films. *RSC Adv.* **7**, 20336-20344 (2017).
21. Bala, M. et al. Evolution of nanostructured single-phase  $\text{CoSb}_3$  thin films by low-energy ion beam induced mixing and their thermoelectric performance. *Phys. Chem. Chem. Phys.* **19**, 24886-24895 (2017).
22. Daniel, M.V. et al. Structural and thermoelectric properties of  $\text{FeSb}_3$  skutterudite thin films. *Phys. Rev. B* **91**, 085410 (2015).

23. Yang, Y.J. et al. Thermoelectric properties of CoSb<sub>3</sub> nanoparticle films. *Adv. Mater. Res.* **347-353**, 3448-3455 (2012).
24. Latronico, G. et al. Effect of the annealing treatment on structural and transport properties of thermoelectric Sm<sub>y</sub>(Fe<sub>x</sub>Ni<sub>1-x</sub>)<sub>4</sub>Sb<sub>12</sub> thin films. *Nanotechnology* **34**, 115705 (2023).
25. Suzuki, A. Pulsed laser deposition of filled skutterudite LaFe<sub>3</sub>CoSb<sub>12</sub> thin films. *Jpn. J. Appl. Phys.* **42**, 2843 (2003).
26. Zeipl, R. et al. Properties of thin n-type Yb<sub>0.14</sub>Co<sub>4</sub>Sb<sub>12</sub> and p-type Ce<sub>0.09</sub>Fe<sub>0.67</sub>Co<sub>3.33</sub>Sb<sub>12</sub> skutterudite layers prepared by laser ablation. *J. Vac. Sci. Technol. A* **28**, 523-527 (2010).
27. Caylor, J.C., Stacy, A.M., Gronsby, R. & Sands, T. Pulsed laser deposition of skutterudite thin films. *J. Appl. Phys.* **89**, 3508-3513 (2001).
28. Arnache, O. et al. Electrical and structural properties of Ce<sub>0.9</sub>CoFe<sub>3</sub>Sb<sub>12</sub> thermoelectric thin films. *Solid State Commun.* **133**, 343-346 (2005).
29. Ding, Y. et al. High performance n-type Ag<sub>2</sub>Se film on nylon membrane for flexible thermoelectric power generator. *Nat. Commun.* **10**, 841 (2019).
30. Lu, Y. et al. Ultrahigh power factor and flexible silver selenide-based composite film for thermoelectric devices. *Energy Environ. Sci.* **13**, 1240-1249 (2020).
31. Chen, X. et al. Flexible thermoelectric films based on Bi<sub>2</sub>Te<sub>3</sub> nanosheets and carbon nanotube network with high n-type performance. *ACS Appl. Mater. Interfaces* **13**, 5451-5459 (2021).
32. Lu, Y. et al. Staggered-layer-boosted flexible Bi<sub>2</sub>Te<sub>3</sub> films with high thermoelectric performance. *Nat. Nanotechnol.* **18**, 1281-1288 (2023).
33. Jin, Q. et al. Flexible layer-structured Bi<sub>2</sub>Te<sub>3</sub> thermoelectric on a carbon nanotube scaffold. *Nat. Mater.* **18**, 62-68 (2019).
34. Wei, M. et al. Directional thermal diffusion realizing inorganic Sb<sub>2</sub>Te<sub>3</sub>/Te hybrid thin films with high thermoelectric performance and flexibility. *Adv. Funct. Mater.* **32**, 2207903 (2022).

35. Zheng, Z.-H. et al. Harvesting waste heat with flexible Bi<sub>2</sub>Te<sub>3</sub> thermoelectric thin film. *Nat. Sustain.* **6**, 180-191 (2023).
36. Zang, J. et al. Effect of post-annealing treatment on the thermoelectric properties of Ag<sub>2</sub>Se flexible thin film prepared by magnetron sputtering method. *Res. in Phys.* **45**, 106222 (2023).
37. Kato, A. et al. Facile fabrication of n-type flexible CoSb<sub>3-x</sub>Te<sub>x</sub> skutterudite/PEDOT:PSS hybrid thermoelectric films. *Polymers* **14**, 1986 (2022).
38. Rongione, N.A. et al. High-performance solution-processable flexible SnSe nanosheet films for lower grade waste heat recovery. *Adv. Electron. Mater.* **5**, 1800774 (2019).
39. Shang, H. et al. High-performance Ag-modified Bi<sub>0.5</sub>Sb<sub>1.5</sub>Te<sub>3</sub> films for the flexible thermoelectric generator. *ACS Appl. Mater. Interfaces* **12**, 7358-7365 (2020).
40. Varghese, T. et al. Flexible thermoelectric devices of ultrahigh power factor by scalable printing and interface engineering. *Adv. Funct. Mater.* **30**, 1905796 (2020).
41. Shang, H. et al. Bi<sub>0.5</sub>Sb<sub>1.5</sub>Te<sub>3</sub>-based films for flexible thermoelectric devices. *J. Mater. Chem. A* **8**, 4552-4561 (2020).
42. Kong, D., Zhu, W., Guo, Z. & Deng, Y. High-performance flexible Bi<sub>2</sub>Te<sub>3</sub> films based wearable thermoelectric generator for energy harvesting. *Energy* **175**, 292-299 (2019).
43. Jin, Q. et al. Cellulose fiber-based hierarchical porous bismuth telluride for high-performance flexible and tailorable thermoelectrics. *ACS Appl. Mater. Interfaces* **10**, 1743-1751 (2018).
44. Komatsu, N. et al. Macroscopic weavable fibers of carbon nanotubes with giant thermoelectric power factor. *Nat. Commun.* **12**, 4931 (2021).
