# Supplementary material for: High-performance flexible p-type Ce-filled Fe3CoSb12 skutterudite thin film for medium-to-high-temperature applications
Source: PubMed Central journal article supplement (PMC11102547; doi:10.1038/s41467-024-48677-4), 2024-05-18
Supplement: 41467_2024_48677_MOESM3_ESM.pdf [file 41467_2024_48677_MOESM3_ESM.pdf]

## **Description of Additional Supplementary Files**

### **Supplementary Movie 1:**

Bending flexible films with a homemade automatic bending instrument.

### **Supplementary Movie 2:**

Bending flexible films with a homemade automatic bending instrument.

### **Supplementary Movie 3:**

Detailed information on each component of the platform used for temperature detection.

### **Supplementary Movie 4:**

The variation of detected voltage  $V$  signal with temperature.

### **Supplementary Movie 5:**

The variation of detected current  $I$  signal with temperature.

### **Supplementary Movie 6:**

Measuring thermoelectric power generation in  $\text{CoSb}_3$  thin-film-based thermoelectric devices.

### **Supplementary Movie 7:**

Collecting waste heat for power generation in a scenario involving a curved high-temperature surface.
